1 **Amino acid and carbohydrate tradeoffs by honey bee nectar foragers**  
2 **and their implications for plant-pollinator interactions**

3

4 Harmen P. Hendriksma\*, Karmi L. Oxman, Sharoni Shafir

5 \* Corresponding author: harmenhendriksma@gmail.com, fax nr 00972 89489842

6

7 B. Triwaks Bee Research Center, Department of Entomology, Robert H. Smith Faculty of  
8 Agriculture, Food and Environment. The Hebrew University of Jerusalem, Rehovot  
9 76100, Israel.

10

11 **Keywords**

12 pollination ecology / homing / essential amino acids / equivalence point / nutrient  
13 balance / pH deviation

14

15 **Abstract**

16 Honey bees are important pollinators, requiring floral pollen and nectar for nutrition.  
17 Nectar is rich in sugars, but contains additional nutrients, including amino acids (AAs).  
18 We tested the preferences of free-flying foragers between 20 AAs at 0.1% w/w in  
19 sucrose solutions in an artificial meadow. We found consistent preferences amongst  
20 AAs, with essential AAs preferred over nonessential AAs. The preference of foragers  
21 correlated negatively with AA induced deviations in pH values, as compared to the  
22 control. Next, we quantified tradeoffs between attractive and deterrent AAs at the  
23 expense of carbohydrates in nectar. Bees were attracted by phenylalanine, willing to  
24 give up 84 units sucrose for 1 unit AA. They were deterred by glycine, and adding 100 or  
25 more units of sucrose could resolve to offset 1 unit AA. In addition, we tested  
26 physiological effects of AA nutrition on forager homing performance. In a no-choice  
27 context, caged bees showed indifference to 0.1% proline, leucine, glycine or  
28 phenylalanine in sucrose solutions. Furthermore, flight tests gave no indication that AA  
29 nutrition affected flight capacity directly. In contrast, low carbohydrate nutrition  
30 reduced the performance of bees, with important methodological implications for  
31 homing studies that evaluate the effect of substances that may affect imbibition of  
32 sugar solution. In conclusion, low AA concentrations in nectar relative to pollen suggest  
33 a limited role in bee nutrition. Most of the 20 AAs evoked a neutral to a mild deterrent  
34 response in bees, thus it seems unlikely that bees respond to AAs in nectar as a cue to  
35 assess nutritional quality. Nonetheless, free choice behavior of foraging bees is  
36 influenced, for instance by phenylalanine and glycine. Thus, AAs in nectar may affect  
37 plant-pollinator interactions and thereby exhibit a selective pressure on the flora in the  
38 honey bee habitat.

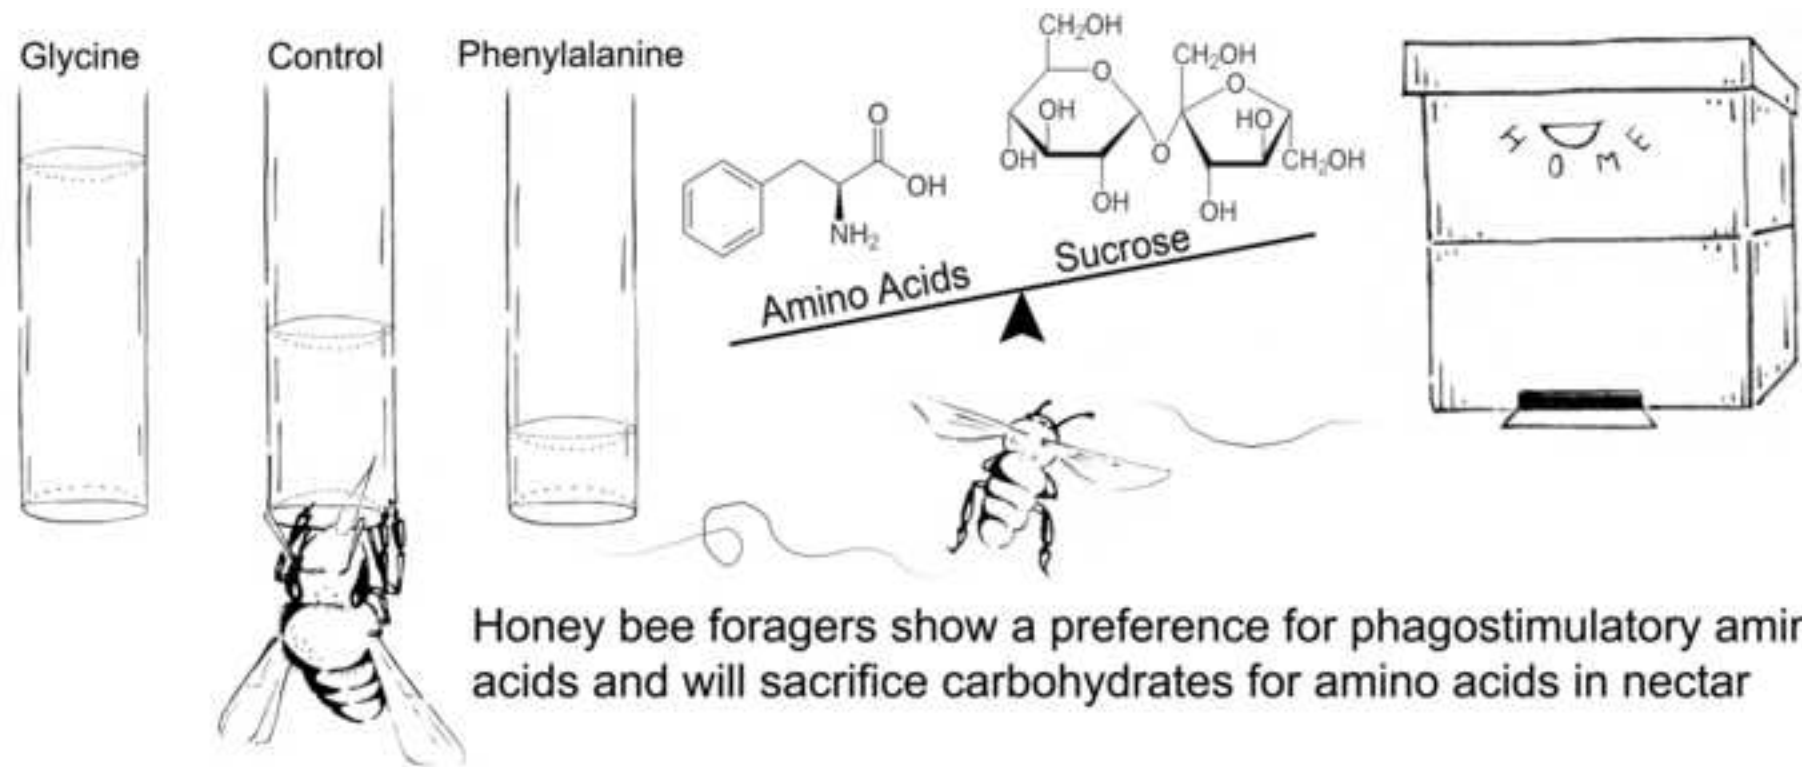

Honey bee foragers show a preference for phagostimulatory amino acids and will sacrifice carbohydrates for amino acids in nectar

## HIGHLIGHTS

- Amino acids in artificial nectar elicit preferences from honey bee foragers
- Amino acid identity, pH, and essentiality explain preferences of bees
- A honey bee forager is willing to pay a premium of carbohydrates for amino acids
- Carbohydrate nutritional state affects flight performance of foraging bees

39

## 40 **1. Introduction**

41

42 The honey bee, *Apis mellifera*, is a key contributor to the pollination of crops worldwide.  
43 The nutritional need of honey bee colonies for floral pollen and nectar is the  
44 fundamental driver for this valuable ecosystem service. Pollen contains nutrients for  
45 growth, such as essential amino acids (AAs) in proteins, certain lipids, and essential trace  
46 elements like minerals and vitamins (Free, 1987; Herbert and Shimanuki, 1978). Nectar  
47 is the main source of sugars and additionally it provides AAs, lipids, antioxidants, and  
48 potentially toxic secondary metabolites (Baker, 1977). The proportion of forager bees  
49 for pollen and nectar is determined by the nutritional state of the colony and the  
50 availability of floral resources in the environment (Calderone and Johnson, 2002;  
51 Camazine, 1993; Seeley, 2009).

52 It is still debated whether pollen-collecting insects, such as honey bees (Fewell  
53 and Winston, 1992; Saa-Otero et al., 2000) and bumblebees (Rasheed and Harder,  
54 1997a, b), maximize foraging efficiency by preferentially switching to protein-rich pollen.  
55 Whereas Levin and Bohart (1955) found for five of six pollen types offered at feeding  
56 stations that the preference ranked according to crude protein content, Schmidt (1982)  
57 found no clear relation between preferences for eight pollens and their protein content.  
58 Similarly, choice experiments have shown that honey bees do not assess pollen protein  
59 content (Pernal and Currie, 2001, 2002). This is not surprising considering that protein is  
60 very rarely present in the pollenkitt, the oily layer coating the pollen grain, and free  
61 amino acids were not found in the pollenkitt of any of 69 plants studied (Dobson, 1988).  
62 It appears that cues other than protein content affect bee pollen preferences. Such cues  
63 may include odors, phagostimulants and phagodeterrents (Schmidt, 1982), grain size  
64 (Pernal and Currie, 2002), and pollen concentration; honey bees dance more rigorously  
65 to a feeder containing a higher pollen-to-cellulose ratio (Waddington, 2001;  
66 Waddington et al., 1998).

67 In contrast, far more is known on the ability of forager bees to evaluate the  
68 nutritional value of nectar. The main total dissolved solids (TDS) in nectar are sugars,

69 and bees can readily determine sugar content. They can discriminate small differences  
70 in sugar concentration (Afik et al., 2006; Frisch, 1967; Shafir et al., 2008), and nectar  
71 volume and variability (Shafir et al., 2005; Waddington and Gottlieb, 1990). Honey bees  
72 are able to perceive and show preference for nectar mineral contents, secondary  
73 compounds and certain AAs (Afik et al., 2006; Carter et al., 2006; Cook et al., 2003;  
74 Gardener and Gillman, 2002; Kim and Smith, 2000; Singaravelan et al., 2005). The means  
75 of sensing nectar composition are receptor based, with different kinds of taste receptors  
76 on the proboscis and mouth parts (Goodman, 2003; Sanchez, 2011). It is unknown  
77 however, to what extent amino acid (AA) presence in nectar is valued, and further, if  
78 potential preferences are related to the nutritional state of the colony. Whereas pollen  
79 is the main source of AAs for bees, we cannot exclude the possibility that deficiencies in  
80 particular AAs in the colony may also modulate preference for nectars which contain  
81 those AAs.

82 A colony needs a minimum level of essential AAs to assimilate proteins for  
83 growth (De Groot, 1953). Hence, a preference for essential over non-essential AAs may  
84 be an adaptive strategy for bees. To date however, a general preference for essential  
85 AAs has not been found, though certain individual AAs are known to evoke  
86 phagostimulant or phagodeterrant effects on bees (Inouye and Waller, 1984). Honey  
87 bee studies have tested AAs singly, e.g. on consumptive responses (Inouye and Waller,  
88 1984) or on olfactory perception (Linander et al., 2012). However, in the present study,  
89 we offered all AAs simultaneously in order to compare AA preferences in relation to one  
90 another. This may reveal insights in how honey bees in a floral habitat respond to a  
91 complexity of choice options. An AA-induced gustatory preference may influence plant  
92 pollinator interactions, which can have ecological and evolutionary consequences by  
93 affecting gene flow within and between plant populations (Gardener and Gillman, 2002;  
94 Gottsberger et al., 1984; Nepi et al., 2012). In addition to direct preference effects, AAs  
95 may induce more subtle plant pollinator interactions. AA levels in bees may stimulate or  
96 inhibit learning and memory (Chalisova et al., 2011), thereby influencing flower

97 association by free flying foragers, as has been shown for nicotine in nectar (Wright et  
98 al., 2013).

99 Forager preferences for AAs may come with benefits. Proline for example, has  
100 been described as a flight muscle stimulant (Barker and Lehner, 1972; Carter et al.,  
101 2006; Micheu et al., 2000; Mollaei et al., 2013). At the same time, a preference may  
102 come at a cost when the perceived profitability exceeds the benefit. This would be the  
103 case if uptake due to phagostimulating AAs were in lieu of carbohydrate uptake.

104 If foragers alter their intake of carbohydrates, they might pay a physiological  
105 price, either in terms of fuel for flight, or their flight ability could change, for instance  
106 due to alterations in their carrying load. By means of homing experiments, we explored  
107 whether AAs in nectar elicit physiological effects on forager bees. In particular, we  
108 compared the indirect effect of phagostimulant and phagodeterent AAs on sucrose  
109 uptake, consequent nutritional state of the bee, and its effect on homing success and  
110 flight speed.

111 An additional aim of our study was to test the relative preferences of free flying  
112 nectar foragers between simultaneously presented AA-enriched sucrose feeders. Since  
113 AAs in artificial nectar may affect forager choice, we tested for a tradeoff between AAs  
114 and carbohydrate in collected nectar. We quantified evoked responses by comparing  
115 units of AAs to equivalent units of sugar, thereby calculating the energetic cost of  
116 choice.

117

## 118 **2. Materials and Methods**

119

120 The experiments were conducted at the Benjamin Triwaks Bee Research Center in  
121 Rehovot, Israel, with the local line based mostly on the Italian honey bee strain *Apis*  
122 *mellifera ligustica*.

123

### 124 **2.1. Preference between nonessential and essential amino acids**

125

126 In March, October and November 2013, bees were trained to forage on ten 200 ml  
127 feeders filled with honey-tainted sucrose solutions (30% w/w), hanging at fences in the  
128 vicinity of two of our apiaries. At any time, 20 to 30 colonies of free-flying bees were  
129 present. Once foragers were visiting the fence sites, a few dozen 2 ml glass tubes with  
130 one open end were filled with 20% sucrose solutions and hung on 2.5 x 2 m fence  
131 sections to train the bees to visit the tubes. The feeding tubes together on the fence  
132 formed an artificial meadow to conduct experiments. In order to unravel the complexity  
133 of nectar foragers choice patterns, this novel test approach allows testing a wide range  
134 of treatments.

135 To test honey bee forager preferences among AA-enriched artificial nectars, a  
136 series of choice experiments was started by hanging new tubes with AA solutions in the  
137 fence sections. Each AA treatment was presented in 1.8 ml 20% sucrose solutions,  
138 enriched with an AA at 0.1% (w/w). Abbreviations for amino acid names used  
139 throughout the manuscript are listed in Supplement 2. Depending on molecular weights  
140 of each AA, treatment solutions were in range of 5.3 – 14.3 mM (Supplement 2). The  
141 solutions were always offered in presence of a control (20% sucrose solution).  
142 Considering a crop volume of maximally 70  $\mu$ L, it takes at least 25 bee visits to empty a  
143 tube with a volume of 1.8 ml of liquid.

144 In three experimental designs, we tested 8 nonessential AAs (72 test tubes  
145 offered to bees in 8 replicate fence sections), 10 essential AAs (88 test tubes in 8  
146 replicate sections), and 20 AAs together (542 feeding tubes in 25 replicate sections). The  
147 tubes were hung according a Latin square design, so that each treatment appeared in a  
148 different spatial position in every replicate fence section. The experiment with all the  
149 AAs was replicated at March 13 and 15, and November 16, at two apiaries. Each apiary  
150 contained 20-30 hives, which were exchanged from time to time. Additional details of  
151 the experimental designs are given in the supplementary material (Supplement 1: S1-a,  
152 S1-b and S1-c). The pH values of the solutions were measured for each batch of test  
153 solutions (Supplement 2).

154           The fluid levels in the test tubes were marked at the meniscus at the start and  
155 end of the experiment. As soon as the first tubes in a section were nearly or completely  
156 empty, all tubes in that section were turned upwards, so that the content was no longer  
157 available to the bees. We then measured the column height of the collected solution in  
158 each glass tube to the nearest mm. For every AA treatment, proportional consumption  
159 values were calculated on the total solution collected per replicate fence section.

160

## 161 **2.2. Tradeoff between carbohydrates and amino acids**

162

163 To quantify the tradeoff between sucrose and amino acids, glass tubes were hung at 12  
164 replicate fence sections, offering 12 AA treatments to free flying foragers. The test was  
165 conducted as a 12x12 Latin square design (Supplement 1: S1-d). Treatments were  
166 control solutions of 15, 18, 21, and 24% sucrose (w/w), solutions of 15, 18, 21, and 24%  
167 sucrose with 0.1% phenylalanine (Phe), and solutions of 15, 18, 21, and 24% sucrose  
168 with 0.1% glycine (Gly). Based on the findings from the AA-choice experiment (see 2.1.),  
169 phenylalanine was chosen to represent a phagostimulant, and glycine to represent a  
170 phagodeterrent. The phenylalanine and glycine treatments had pH values similar to the  
171 control ( $pH_{\text{Control}} = 6.15$ ,  $pH_{\text{Phe}} = 6.23$ ,  $pH_{\text{Gly}} = 6.28$ ). Data were collected on the  
172 proportional consumption of treatment solutions per fence section. The data were then  
173 used to extrapolate sucrose tradeoff levels where a 0.1% AA solution would be equally  
174 collected compared with a sucrose control.

175           We tested these extrapolated values in two additional experiments. In one  
176 experiment, there were three treatments: a 20% sucrose control, a lower sucrose  
177 concentration with 0.1% phenylalanine, and a higher sucrose concentration with 0.1%  
178 glycine. Throughout 9 fence sections, in which each solution was represented twice, 18  
179 replicates of each solution were presented to free-flying bees (Supplement S4). The  
180 results confirmed the equivalence sucrose concentration for phenylalanine, but  
181 suggested a higher sucrose equivalence concentration for glycine. In a follow-up



182 experiment, we presented four treatments: a 20% sucrose control, and 20%, 30% and  
183 40% sucrose solutions each enriched with 0.1% glycine (Supplement S4).

184

### 185 **2.3. The effect of amino acid and carbohydrate consumption on homing success**

186

187 To study AA and sucrose nutrition effects on foragers, three homing tests were  
188 performed (H1, H2 and H3). All test individuals were homecoming foragers that were  
189 collected by closing the entrance to a test hive. Captured bees were placed on ice for  
190 several minutes until they stopped moving, marked on their thorax with a color to  
191 indicate the treatment they would receive, and placed in groups of 15 or 20 bees in a  
192 clear plastic jar with a mesh opening on the side for ventilation. Over the three homing  
193 experiments, a total of five hives were tested, with a total of 2079 bees placed in 130  
194 clear plastic jars (details in Supplement 3).

195 Every jar received two glass tubes through holes in the lid, each containing 1.8  
196 ml of test solution. The jars were then placed in an empty hivebox, on top of a  
197 populated hivebox. The two boxes were separated by means of a queen excluder  
198 covered with a 1 mm<sup>2</sup> mesh. This allowed the bees in the jars above to feel the warmth  
199 and scent of the colony below. The levels of test solution were marked on the tubes as  
200 soon as they were inserted into the jars. The levels were marked twice a day, in parallel  
201 to noting the number of dead bees per jar, to determine how many individuals  
202 contributed to consuming the treatment solutions over time, and to monitor for  
203 treatment-related mortality effects.

204 On the day of the homing experiment, bees were released forenoon  
205 approximately 600 m from the hive. Bees were released onto an arena. During the thirty  
206 minutes after release, moribund and dead individuals were collected and counted. The  
207 “dead” bees included those that died during the pre-phase of the experiment, whereas  
208 “moribund” bees were those that were not able to fly away from the arena within thirty  
209 minutes. Experimenters back at the test hives were notified when the bees were  
210 released. The hive entrances were closed and every homecoming marked bee was

211 captured, in order to prevent recounts, over a three hour time period. The return time  
212 and color for every test bee was recorded. After each experiment, the test hives were  
213 opened to verify the absence of marked bees.

214 During the first homing experiment (H1), the treatments were 40% sucrose (1),  
215 and 40% sucrose enriched by 0.1% phenylalanine (2), 0.1% leucine (3), 0.1% proline (4),  
216 or 0.1% glycine (5). Alike the fence experiments, these particular amino acids were  
217 chosen to represent phagostimulants, phagodeterrents, nonessential, and essential  
218 amino acids as well as being pH neutral in comparison to the control. Fifteen bees were  
219 kept in each plastic jar ( $n_{\text{jars}}=70$ ), for a total of 1050 bees from two colonies (Supplement  
220 3). To test for possible effect of foraging task specialization, foragers returning with  
221 pollen loads ( $n_p=300$ ) were collected from one hive and foragers returning without  
222 pollen loads ( $n_N=300$ ) from another. We presume that most bees returning without  
223 pollen loads were nectar foragers, and refer to them as such, though we did not  
224 examine their crop content (few may be water collectors or returning with empty  
225 crops). We conducted a replicate trial at a different date, in which the type of forager  
226 collected from each hive was switched ( $n_p=225$ , and  $n_N=225$ ). The total imbibition time  
227 before release in the homing experiment was 36 h.

228 The second homing experiment (H2) was performed with three carbohydrate  
229 treatments at different concentrations: 8, 16, and 32% sucrose (w/w). Test bees were  
230 caught over two experimental days, again distinguishing pollen foragers from non-  
231 pollen foragers on two trial dates (Supplement 3). Twenty bees were kept per jar  
232 ( $n_{\text{jars}}=28$ ), with a total of 549 marked bees from two colonies. Time until release was  
233 shortened to 16 h, to avoid mortality of bees fed the low concentration of sucrose  
234 solution.

235 A third homing experiment (H3) was completed with four treatments: a control  
236 solution of 20% sucrose (1), or 20% sucrose enriched with 0.1% phenylalanine (2), 0.1%  
237 glycine (3), or 0.1% proline (4). With a total of 480 marked bees, fifteen individuals were  
238 kept per jar ( $n_{\text{jars}}=32$ ), and incubated for 20 h on top of two colonies. Each treatment  
239 was replicated eight times, including a duplication by separately testing pollen and non-

240 pollen foragers, and the use of two colonies, others than used for H1 and H2  
241 (Supplement 3). In H3 we tested a 20% sucrose solution, in contrast to 40% sucrose in  
242 H1. First, because amino acids taste might be masked at 40% sucrose, and second, to  
243 test within a concentration range where the carbohydrate nutrition can induce a  
244 limitation effect (see H2; survival or flight performance).

245

#### 246 **2.4. Data analysis**

247

248 Statistics were performed with the JMP Pro software, version 10, SAS Institute Inc.  
249 Analyses were performed with general linear models, with a visual inspection of the  
250 standardized residuals to evaluate the assumptions of appropriate normality of the  
251 response variable, and normally distributed errors with homogeneous variance. In  
252 addition, parametric survival analyses (Weibull) were used to investigate flight times in  
253 the homing tests.

254 Forager preferences for AAs were analyzed according to the proportional  
255 consumption data by means of an Anova in which AA identity was entered as a factor  
256 with 9, 11 or 21 levels (including the controls), for nonessential, essential and all  
257 individual AAs, respectively. A post hoc Dunnett test was used to compare choice for  
258 each AA solution with the control. A potential seasonal effect on preference was also  
259 considered by testing the interaction between AAs as a factor, and the two test months  
260 March or October as a factor; this interaction was removed from the model when it was  
261 not significant. Choice among AA solutions was analyzed a second time, on AA  
262 essentiality (a 2 leveled factor; 10 essential versus 10 non-essential AAs per fence  
263 section) together with the deviation in pH value from the control (a continuous  
264 variable). The control values were excluded in this second analysis as the pH deviation  
265 was calculated relative to the control, and since the control solutions did not contain an  
266 essential or non-essential AA. Due to the double analyses on the source data, we  
267 applied a Bonferroni-correction and set the threshold for significance at  $\alpha=0.025$ .

268 For the assessment of the tradeoff between AAs and carbohydrates, regressions  
269 were performed on the proportions of collected treatment solutions per fence section,  
270 considering a sucrose concentration gradient (a continuous variable of 15-24% sucrose  
271 solutions) and including the AA treatments (a 3 leveled factor: phenylalanine, glycine,  
272 control), with a post hoc Dunnett test to indicate differences between the two AAs and  
273 the control. The regression line equations allowed the extrapolation of a sucrose  
274 concentration equivalence point, which gave estimated equal consumptions of  
275 phenylalanine and glycine treatments, as compared to a control solution of 20%  
276 sucrose.

277 Hereafter, the phenylalanine and glycine treatment solutions, as previously  
278 extrapolated, were experimentally tested in a new artificial meadow set-up  
279 (Supplement 4), and the proportions of foraged treatment solutions per fence section  
280 were compared by means of an Anova with a Post Hoc Dunnett test, comparing the  
281 0.1% phenylalanine and glycine solutions to the control.

282 For the homing experiments H1, H2 and H3, we used a factorial design,  
283 considering four factors: treatment, forager type, trial date and colony (Supplement 3).  
284 The two tested continuous response variables were the amount of test solution imbibed  
285 per bee, and the mortality during the imbibition period. The analyses were performed  
286 on mean values per replicate jar, applying post hoc Tukey tests to differentiate between  
287 levels. The return rates in homing flight tests of bees were compared by means of Chi-  
288 square tests on the numbers of returning bees versus non-returning bees, with one test  
289 for each of the factors mentioned above. The flight times in experiments were  
290 compared using the bee return data, employing survival analyses, once for every factor.  
291 P-value significance was considered after Bonferroni corrections for multiple  
292 comparisons.

293

### 294 **3. Results**

295

#### 296 **3.1. Preferences between amino acids**

297

298 When tubes with 20% (w/w) sucrose solution enriched with individual AAs were offered  
299 in an artificial meadow, nectar foragers showed significant choice differences amongst  
300 the 8 nonessential AA enrichments with a control ( $F_{8,63}=8.16$ ,  $P<0.001$ ), amongst the 10  
301 essential AA enrichments with a control ( $F_{10,77}=3.97$ ,  $P<0.001$ ), and also between all 20  
302 AA enrichments with a control ( $F_{20,472}=8.94$ ,  $P<0.001$ ) (Fig. 1A). A consistency in the  
303 order of AA choice is indicated as the consumed proportions of the 10 essential AAs,  
304 when tested alone, strongly correlated to those when all 20 AAs were tested together  
305 (regression on proportion results of AAs between tests;  $r^2=0.74$ ,  $F_{1,9}=25.5$ ,  $P<0.001$ ).  
306 Similarly, the results on the 8 non-essential AAs alone strongly correlated to those while  
307 testing all AAs together ( $r^2=0.82$ ,  $F_{1,7}=31.2$ ,  $P<0.001$ ). The choice among AAs was  
308 consistent between the test months March and October (interaction AA and Months:  
309  $F_{40,434}=1.22$ ,  $P=0.24$ ). A post hoc comparison indicated that glutamate, aspartate,  
310 histidine, cysteine and glycine were significantly disliked compared to the control (Fig.  
311 1). Foragers preferred phenylalanine the most, although not significantly more than the  
312 control.

313 A significant preference was found for essential AA's over non-essential AA's  
314 ( $F_{1,465}=12.17$ ,  $P<0.001$ ), and at the same time, the AA induced deviations in pH (absolute  
315 value relative to the control) were a significant cause for dislike ( $F_{1,465}=28.54$ ,  $P<0.001$ )  
316 (Fig. 1B). Overall, the acidity of the test solutions ranged between pH=2.26 (0.1%  
317 cysteine) and pH=9.33 (0.1% arginine) (Supplement 2).

318

### 319 **3.2. Tradeoff between carbohydrates and amino acids**

320

321 When the range of 15% to 24% sucrose solutions were offered to foragers in an artificial  
322 meadow (Fig. 2), they showed preferences for higher sucrose concentrations ( $F_{1,140}=$   
323  $8.05$ ,  $P=0.005$ ), and simultaneously phenylalanine was a significant phagostimulant, and  
324 glycine a phago-deterrent ( $F_{2,140}=30.9$ ,  $P<0.001$ ; with posthoc significances for both  
325 glycine < control and phenylalanine > control). In Figure 2, the control regression line [y

326 = 0.019x + 0.175] at concentration 20% indicates a consumed proportion of 0.549. At  
327 this level, the 0.1% phenylalanine regression line [ $y = 0.012x + 0.425$ ] is at a  
328 concentration of 10.6% sucrose, hence at + $\Delta$ 9.4% sucrose equivalence. At the same  
329 level, the 0.1% glycine regression line [ $y = 0.026x - 0.273$ ] is at 31.4% sucrose, hence a -  
330  $\Delta$ 11.4% sucrose equivalence. The equivalence extrapolation for phenylalanine reveals an  
331 expected AA to carbohydrate ratio of 1/94 parts w/w, and a ratio of 1/114 parts w/w for  
332 glycine.

333 In two additional experiments we compensated AA presence with sucrose in order to  
334 offset the attraction and deterrence of phenylalanine and glycine, respectively  
335 (Supplement 4). In the first experiment, foragers collected dissimilar proportions of test  
336 solutions ( $F_{2,51}=10.1$ ,  $P<0.001$ , power=0.98 at  $\alpha=0.05$ ). An 11.6% sucrose solution with  
337 0.1% phenylalanine was collected similar to the 20% sucrose control ( $P=0.29$ ), whereas a  
338 31.7% sucrose solution with 0.1% phenylalanine was collected significantly less  
339 ( $P<0.001$ ). We therefore conducted a follow-up experiment to test sucrose  
340 compensation for the deterrent effect of glycine. Solutions were again dissimilarly  
341 collected ( $F_{3,60}=25.6$ ,  $P<0.001$ , power=1.00 at  $\alpha=0.05$ ), with glycine reconfirmed to be  
342 unattractive to foragers (20% sucrose + 0.1% glycine) as compared to the control  
343 ( $P=0.026$ ). However, in this experiment the glycine effect was offset by + $\Delta$ 10% sucrose  
344 ( $P=0.08$ ), whereas glycine + $\Delta$ 20% sucrose was significantly more collected than the  
345 control ( $P<0.001$ ). Thus, in line with our extrapolations, we could confirm the AA to  
346 carbohydrate ratio (1 part phenylalanine  $\approx$  84 parts sucrose, and 100 parts sucrose  $\leq$  1  
347 part glycine < 200 parts sucrose).

348

### 349 **3.3. The effect of amino acids and carbohydrates on homing success**

350

351 The results of the homing test are summarized in Tables 1, 2 and 3. The addition of 0.1%  
352 AAs in sucrose solutions did not evoke effects on treatment solution imbibition (Fig. 3),  
353 mortality and return rates (Fig. 4), or flight times (Fig. 5), either at 40% (H1) or 20% (H3)

354 sucrose solutions. Interactions between AA treatment and other factors were not  
355 indicated.

356 Forager type effects were found, with nectar foragers imbibing less sucrose  
357 solutions, and having a lower mortality in H1, though this finding was not present in H2  
358 and H3. Exclusively in H2, pollen foragers returned a notable 10 minutes earlier than  
359 nectar foragers ( $P: 25 \text{ min} < N: 35 \text{ min}$ ; though insignificant after Bonferroni correction).  
360 Colony effects were found throughout the homing experiments, on sucrose uptake and  
361 bee mortality (between colonies A&B and D&E), return rates (between A&B and B&C),  
362 and flight times (between B&C).

363 The test on the effect of carbohydrate nutrition on forager homing performance  
364 (H2) showed that a relatively low volume per bee was consumed at the lowest  
365 carbohydrate concentration. A significant increase in sucrose uptake in  $\mu\text{L}$  and mg was  
366 observed over the sucrose gradient ( $P=0.01$  and  $P<0.001$ , respectively, Fig. 3B). A high  
367 sucrose uptake in mg (Fig 3.) correlated with a reduction in mortality (Linear regression;  
368  $P=0.01$ ,  $R^2=0.22$ ), with 66, 17, and 1 deaths at 8%, 16% and 32% sucrose, respectively  
369 (Fig. 4-H2). The return rates of bees were not different for the three carbohydrate  
370 treatments. However, the median flight time of 14.5 minutes at the highest sucrose  
371 concentration was significantly shorter than the 35 and 36.5 minutes median it took  
372 those that received the lower sucrose concentrations (Table 2, Fig. 5B).

373

#### 374 **4. Discussion**

375

376 As main results, we found consistent preferences of free-flying honey bee foragers for  
377 certain AAs over others, and for essential over non-essential AAs (Fig. 1). Furthermore,  
378 we found that bees were willing to pay a considerable carbohydrate premium for their  
379 AA preferences (Fig. 2). Bees were significantly attracted by 0.1% enriched  
380 phenylalanine solutions, as compared to the controls, and willing to give up 84 units  
381 sucrose for 1 unit AA. The bees were significantly deterred by glycine, but adding a 100  
382 or more units of sucrose could resolve to offset the effect of 1 unit AA.

383 Roubik et al. (1995a) found the stingless bee *Melipona fuliginosa* to avoid  
384 glutamate, glycine, serine, alanine, and arginine at concentrations of 35 to 80 mM AA in  
385 50% sucrose solutions ( $\approx 0.6\%$  w/w on average), and *M. fuliginosa* valued the  
386 deterrence equal to control solutions of 20 to 40% sucrose ( $-\Delta 10\%$  to  $-\Delta 30\%$  sucrose). It  
387 reveals a ratio in range of 1/17 to 1/50 parts AA to carbohydrate to offset deterrence.  
388 This is less expensive than for honey bees, considering their glycine deterrence  
389 compensation with 100 or more parts sucrose.

390 The premiums in sucrose that bees are willing to pay for AA can be biologically  
391 significant; mortality of bees fed an 8% sucrose solution was greater than those fed 16  
392 or 32% sucrose (Fig. 4), and it took those that survived twice as long to home back to the  
393 hive (Fig. 5B). For a honey bee colony, the caloric uptake of carbohydrates is lowered  
394 when foragers systematically prefer low sucrose nectars with phagostimulant AAs, or  
395 evade high sucrose nectars with deterrent AAs. From the plant perspective, plants can  
396 substitute expensive carbohydrates in their nectar with minute concentrations of  
397 phagostimulating AAs, or modulate pollinator visits by adding phagodeterrent AAs.

398 An artificial meadow assay allowed us to test the preference of free flying  
399 foragers between 20 AAs that were simultaneously present, and we found a preference  
400 for essential over non-essential AAs. Insect research has shown that an animal's  
401 sensitivity to taste can change according to the need for nutrients due to the under-  
402 representation of nutrients evoking over-sensitivity on the receptor level (Abisgold and  
403 Simpson, 1987; Simmonds et al., 1992; Simpson et al., 1991). Perhaps, the current  
404 finding that essential AAs are more preferred than nonessentials, might relate to the yet  
405 unknown ability of forager bees to respond to specific nutritional shortcomings within  
406 their colony. We found a consistent AA preference profile between colonies at the  
407 beginning of spring growth (March) and autumn (October), but we did not specifically  
408 manipulate or assess colony needs in this study. When testing honey bees in a no-choice  
409 assay with single AAs, Inouye and Waller (1984) did not find preference effects due to  
410 essentiality of AAs. Similarly, in dual choice preference tests with *Drosophila*, Toshima



411 and Tanimura (2012) found AA preferences unrelated to the classification of essential or  
412 non-essential, nor to other chemical properties.

413 The natural pH of floral nectar is reported to range between 4.2 and 8.5 (Baker,  
414 1977). The pH of the dissolved purified AAs at 0.1% (w/w) solutions were between 2.3  
415 and 9.3, which lies beyond the natural range in nectar (Supplement 2). We found that  
416 0.1% AA could affect nectar pH, and that foragers were sensitive to the pH (Fig. 1B). The  
417 statistical model showed independent effects on bee preferences of whether AAs were  
418 essential or not and of their pH. Furthermore, the pH of glycine and phenylalanine  
419 enriched solutions were similar, yet the former was consistently disliked by the bees  
420 whereas the latter was consistently preferred (Fig. 2). Thus, pH affects forager choice  
421 but only partially explains preferences between AAs. The pH of the resulting solution  
422 should always be considered in taste or preference studies that dissolve purified AAs in  
423 solution.

424 In our study, bees could use both olfaction and gustation to discriminate  
425 between AA solutions. Linander et al. (2012) showed that bees could discriminate  
426 between the odor of single dissolved AAs and the control solvent, specifically aspartate,  
427 cysteine, proline, tryptophan, and tyrosine. A conversion by molecular weight indicates  
428 our AA concentrations in range of 5.3 – 14.3 mM (supplement 2). This is one order of  
429 magnitude smaller than the test concentration of 100 mM as used by Linander et al.  
430 (2012). Nonetheless, the discrimination between cysteine and aspartate from the  
431 control in our experiments (Fig. 1) could thus have been facilitated by olfactory cues. We  
432 found that free-flying foragers could also discriminate phenylalanine and glycine from  
433 the control (Fig. 2). This discrimination may have relied on gustation. Although bees are  
434 able to discriminate proline, tryptophan and tyrosine from the control by scent at  
435 100mM (Linander et al., 2012), we did not find preference effects for these AAs at the  
436 tested concentration of 0.1% (<10mM).

437 Honey bees show a significant phagostimulatory effect of phenylalanine and a  
438 phagodeterrent effect of glycine (Fig. 2), which is consistent with the findings of Inouye  
439 and Waller (1984). However, considering the results in Figure 1, the choice among AAs

440 for which bees did not show extreme preferences was not always consistent with other  
441 studies. For example, proline at concentrations similar to those that we studied, has  
442 generally been reported to be attractive to bees (Bertazzini et al., 2010; Carter et al.,  
443 2006; Inouye and Waller, 1984). Similarly, bees in our study favored alanine, but not  
444 significantly more than the control; Bertazzini et al. (2010) and Inouye and Waller (1984)  
445 found alanine to be significantly preferred to the control. Different preferences of bees  
446 between studies may be due to methodology (e.g., choice vs no-choice, free-flying vs  
447 caged), or differences in sensitivity thresholds of different honey bee strains. Such  
448 inconsistencies are more likely to show for AAs that evoke less pronounced preferences;  
449 AAs at the extreme ends seem to be valued more consistently.

450 Of course, preference and deterrence effects are also dependent on AA  
451 concentrations. However, AAs in nectar vary greatly within plants and between species  
452 within several orders of magnitude (Baker, 1977; Nepi et al., 2012; Weiner et al., 2010).  
453 Therefore, we chose to standardize our experimental setup, and test all AAs at the same  
454 concentration of 0.1% (w/w), which lies within the higher boundary of the natural  
455 range. It is for instance comparable to *Lantana camara* nectar, with 16 mM total AA (an  
456 approximate 0.1% w/w); a plant visited by bees and many butterflies and described to  
457 have a relative high amino acid concentration (Alm et al., 1990).

458 In addition to honey bees, AA preferences are reported for tropical stingless  
459 bees (Gardener et al., 2003; Roubik et al., 1995b), solitary bees (Weiner et al., 2010),  
460 butterflies (Erhardt and Rusterholz, 1998), ants (Bluthgen and Fiedler, 2004a, b; Wada et  
461 al., 2001), flies (Potter and Bertin, 1988), and nectivorous bats (Rodriguez-Pena et al.,  
462 2013). Differences in taste perception between diverse pollinators likely affect nectar  
463 perception and may be a factor in how plants bias pollinator visits, thereby affecting  
464 gene flow within and amongst plant populations (Nepi et al., 2012).

465 AA concentrations in nectar are low relative to pollen, thereby suggesting a  
466 limited role in bee nutrition. For pollen, it has been described that plants visited by  
467 oligolectic insects have a lower pollen quality, for instance in the ratio of essential to  
468 non-essential AAs, as compared to plants visited only by non-oligolectic insects (Weiner

469 et al., 2010). The noted pollen quality differentiation was however not reflected in the  
470 free amino acids content of the pollens. Thus, since free amino acids are the most likely  
471 cue for a potential taste-based evaluation of AA nutrition, it is not likely that pollinators  
472 respond to nutritional quality based on AA taste alone. Also, most of the 20 AAs tested  
473 in the current study evoked neutral to mild deterrent responses in honey bees, thus it  
474 seems unlikely that bees respond to AAs in nectar as a cue to assess nutritional quality.

475 A substantial question within the current study addressed if AAs in nectar may  
476 affect the physiology and performance of bees. As mentioned, proline may be directly  
477 used as a minor source of flight fuel (Barker and Lehner, 1972; Carter et al., 2006;  
478 Micheu et al., 2000; Mollaei et al., 2013). However, the study by Mollaei et al. (2013)  
479 showed no notable honey bee flight muscle stimulation at 0.1% proline treatment. In  
480 our homing studies proline at 0.1% did also not evoke an effect, neither on the return  
481 rate, nor the median flight time of bees (Table 1 and 3).

482 In contrast to the consistent preferences exhibited by free-flying bees, caged  
483 foragers in a no-choice context imbibed equally from sucrose solution or sucrose  
484 solution enriched with AAs (Fig. 3). A dietary enrichment with either Phenylalanine,  
485 Glycine, Leucine or Proline did not affect their homing performance (Fig. 5A) or other  
486 physiological measures of performance (Table 1 and 3). However, physiology and  
487 performance were directly influenced by carbohydrate nutrition (H2): foragers fed with  
488 lower sucrose concentrations took longer to come back to the hive (Fig. 4). This can  
489 have important methodological implications for homing studies that evaluate the effect  
490 of substances that may affect the imbibition of sugar solution.

491 Forager task specialization affects various physiological and behavioral traits  
492 (Nelson et al., 2007; Page, 2013; Robinson and Vargo, 1997). In one of our homing tests  
493 (H1) pollen foragers imbibed more test solution than non-pollen foragers (Table 1).  
494 Homing ability is an effective assay in eco-toxicological tests, and the amount of test  
495 solution imbibed would affect exposure to toxicants. Our study suggests that controlling  
496 for task specialization could reduce experimental variability.

497 We have presented a novel and useful bioassay by means of an artificial meadow  
498 set-up. We illustrate high test sensitivity, in which steps of only  $\Delta 3\%$  sucrose  
499 concentration show a clear gradient effect, in addition to detecting an AA treatment  
500 effect (Fig. 2). This simple setup could be useful for tackling additional questions about  
501 bee perception of nectar components. Specifically for AAs, we tested them singly, but  
502 Alm et al. (1990) found that honey bees consumed more and longer from nectar sources  
503 which were enriched with a mixture of AAs, compared to nectar without AAs. This  
504 supports the hypothesis that the AAs in nectar contribute to pollinator attraction.  
505 Higher stimulatory effects of mixtures of AAs over single AAs have been frequently  
506 reported also for ants (Lanza, 1988; Lanza and Krauss, 1984). The artificial meadow set-  
507 up would be useful for further research into the complexity of AA attraction of mixtures  
508 compared to single AAs.

509 In conclusion, we found three variables that explain observed AA preferences of  
510 honey bee nectar foragers: AA identity, pH, and essentiality. We identified sucrose  
511 equivalents that foragers are willing to exchange for phagostimulant or phagodeterrent  
512 AAs. Flight performance of foraging bees was affected by nutritional state: foragers  
513 were directly affected by carbohydrate levels, but not directly by either proline, leucine,  
514 phenylalanine or glycine, nor indirectly by their excitatory or deterrent tastes. Both pH  
515 and AAs were detected by the bees in artificial nectar at natural concentrations. Thus,  
516 such preferences by pollinators could affect floral evolution, shaping the biodiversity in  
517 natural ecosystems, and could affect pollination services in agricultural landscapes.

518

### 519 **Acknowledgements**

520 This research was funded jointly by a grant from BBSRC, Defra, NERC, the Scottish  
521 Government and the Wellcome Trust, under the Insect Pollinators Initiative. We thank  
522 Tania Masci, Tal Erez and Yael Katz for assisting in marking bees and recording data, and  
523 for Haim Kalev for apiary management. We also thank Claudio Rolli, Marleen de  
524 Blécourt, two anonymous reviewers and the editor for their valuable and constructive  
525 comments on the MS.

526

527

527

## 528 **References**

- 529 Abisgold, J.D., Simpson, S.J., 1987. The Physiology of Compensation by Locusts for Changes in  
530 Dietary-Protein. *Journal of Experimental Biology* 129, 329-346.
- 531 Afik, O., Dag, A., Kerem, Z., Shafir, S., 2006. Analyses of avocado (*Persea americana*) nectar  
532 properties and their perception by honey bees (*Apis mellifera*). *Journal of Chemical Ecology* 32,  
533 1949-1963.
- 534 Alm, J., Ohmeiss, T.E., Lanza, J., Vriesenga, L., 1990. Preference of Cabbage White Butterflies and  
535 Honey-Bees for Nectar That Contains Amino-Acids. *Oecologia* 84, 53-57.
- 536 Baker, H.G., 1977. Non-Sugar Chemical Constituents of Nectar. *Apidologie* 8, 349-356.
- 537 Barker, R.J., Lehner, Y., 1972. Free Amino-Acids in Thoraces of Flown Honey Bees, *Apis-Mellifera*  
538 L (Hymenoptera-Apidae). *Comparative Biochemistry and Physiology* 43, 163-&.
- 539 Bertazzini, M., Medrzycki, P., Bortolotti, L., Maistrello, L., Forlani, G., 2010. Amino acid content  
540 and nectar choice by forager honeybees (*Apis mellifera* L.). *Amino Acids* 39, 315-318.
- 541 Bluthgen, N., Fiedler, K., 2004a. Competition for composition: Lessons from nectar-feeding ant  
542 communities. *Ecology* 85, 1479-1485.
- 543 Bluthgen, N., Fiedler, K., 2004b. Preferences for sugars and amino acids and their conditionality  
544 in a diverse nectar-feeding ant community. *Journal of Animal Ecology* 73, 155-166.
- 545 Calderone, N.W., Johnson, B.R., 2002. The within-nest behaviour of honeybee pollen foragers in  
546 colonies with a high or low need for pollen. *Animal Behaviour* 63, 749-758.
- 547 Camazine, S., 1993. The Regulation of Pollen Foraging by Honey Bees: How Foragers Assess the  
548 Colony's Need for Pollen. *Behavioral Ecology and Sociobiology* 32, 265-272.
- 549 Carter, C., Shafir, S., Yehonatan, L., Palmer, R.G., Thornburg, R., 2006. A novel role for proline in  
550 plant floral nectars. *Naturwissenschaften* 93, 72-79.
- 551 Chalisova, N.I., Kamyshev, N.G., Lopatina, N.G., Kontsevaya, E.A., Urtieva, S.A., Urtieva, T.A.,  
552 2011. Effect of Encoded Amino Acids on Associative Learning of Honeybee *Apis mellifera*.  
553 *Journal of Evolutionary Biochemistry and Physiology* 47, 607-610.
- 554 Cook, S.M., Awmack, C.S., Murray, D.A., Williams, I.H., 2003. Are honey bees' foraging  
555 preferences affected by pollen amino acid composition? *Ecological Entomology* 28, 622-627.
- 556 De Groot, A.P., 1953. Protein and amino acid requirements of the honeybee (*Apis mellifica* L.),  
557 *Physiol. Comp. Oecologia*, pp. 197-285.
- 558 Dobson, H.E.M., 1988. Survey of Pollen and Pollenkitt Lipids - Chemical Cues to Flower Visitors.  
559 *American Journal of Botany* 75, 170-182.
- 560 Erhardt, A., Rusterholz, H.P., 1998. Do Peacock butterflies (*Inachis io* L.) detect and prefer nectar  
561 amino acids and other nitrogenous compounds? *Oecologia* 117, 536-542.
- 562 Fewell, J.H., Winston, M.L., 1992. Colony State and Regulation of Pollen Foraging in the Honey-  
563 Bee, *Apis-Mellifera* L. *Behavioral Ecology and Sociobiology* 30, 387-393.
- 564 Free, J.B., 1987. *The Biology of the Honey-Bee* - Winston, MI. Science 238, 1591-1592.
- 565 Frisch, K.v., 1967. *Dance language and orientation of bees*. Cambridge, Mass., Belknap Press of  
566 Harvard University Press.
- 567 Gardener, M.C., Gillman, M.P., 2002. The taste of nectar - a neglected area of pollination  
568 ecology. *Oikos* 98, 552-557.
- 569 Gardener, M.C., Rowe, R.J., Gillman, M.P., 2003. Tropical Bees (*Trigona hockingsi*) Show No  
570 Preference for Nectar with Amino Acids. *Biotropica* 35, 119-125.
- 571 Goodman, L., 2003. *Form and function in the honey bee*. Cardiff: The Westdale Press.

- 572 Gottsberger, G., Schrauwen, J., Linskens, H.F., 1984. Amino-Acids and Sugars in Nectar, and Their  
573 Putative Evolutionary Significance. *Plant Systematics and Evolution* 145, 55-77.
- 574 Herbert, E.W., Shimanuki, H., 1978. Chemical Composition and Nutritive-Value of Bee-Collected  
575 and Bee-Stored Pollen. *Apidologie* 9, 33-40.
- 576 Inouye, D.W., Waller, G.D., 1984. Responses of Honey Bees (*Apis-Mellifera*) to Amino-Acid  
577 Solutions Mimicking Floral Nectars. *Ecology* 65, 618-625.
- 578 Kim, Y.S., Smith, B.H., 2000. Effect of an amino acid on feeding preferences and learning  
579 behavior in the honey bee, *Apis mellifera*. *Journal of Insect Physiology* 46, 793-801.
- 580 Lanza, J., 1988. Ant Preferences for Passiflora Nectar Mimics That Contain Amino-Acids.  
581 *Biotropica* 20, 341-344.
- 582 Lanza, J., Krauss, B.R., 1984. Detection of Amino-Acids in Artificial Nectars by 2 Tropical Ants,  
583 *Leptothorax* and *Monomorium*. *Oecologia* 63, 423-425.
- 584 Levin, M.D., Bohart, G.E., 1955. Selection of pollens by honey bees. *Am Bee Journal* 95, 392-393,  
585 402.
- 586 Linander, N., de Ibarra, N.H., Laska, M., 2012. Olfactory Detectability of L-Amino Acids in the  
587 European Honeybee (*Apis mellifera*). *Chemical Senses* 37, 631-638.
- 588 Micheu, S., Crailsheim, K., Leonhard, B., 2000. Importance of proline and other amino acids  
589 during honeybee flight (*Apis mellifera carnica* POLLMANN). *Amino Acids* 18, 157-175.
- 590 Mollaei, M., Hoseini, S.A., Karimi, M., Hekmat, Z., 2013. Short communication. Impact of the  
591 amino acid proline on the cold hardiness of honey bee, *Apis mellifera* L. *Spanish Journal of*  
592 *Agricultural Research* 11, 714-717.
- 593 Nelson, C.M., Ihle, K.E., Fondrk, M.K., Page, R.E., Amdam, G.V., 2007. The gene vitellogenin has  
594 multiple coordinating effects on social organization. *Plos Biology* 5, 673-677.
- 595 Nepi, M., Soligo, C., Nocentini, D., Abate, M., Guarnieri, M., Cai, G., Bini, L., Puglia, M., Bianchi,  
596 L., Pacini, E., 2012. Amino acids and protein profile in floral nectar: Much more than a simple  
597 reward. *Flora* 207, 475-481.
- 598 Page, R.E., 2013. *The Spirit of the Hive: The Mechanisms of Social Evolution*. Harvard University  
599 Press.
- 600 Pernal, S.F., Currie, R.W., 2001. The influence of pollen quality on foraging behavior in  
601 honeybees (*Apis mellifera* L.). *Behavioral Ecology and Sociobiology* 51, 53-68.
- 602 Pernal, S.F., Currie, R.W., 2002. Discrimination and preferences for pollen-based cues by  
603 foraging honeybees, *Apis mellifera* L. *Animal Behaviour* 63, 369-390.
- 604 Potter, C.F., Bertin, R.I., 1988. Amino-Acids in Artificial Nectar - Feeding Preferences of the Flesh  
605 Fly *Sarcophaga Bullata*. *American Midland Naturalist* 120, 156-162.
- 606 Rasheed, S.A., Harder, L.D., 1997a. Economic motivation for plant species preferences of pollen-  
607 collecting bumble bees. *Ecological Entomology* 22, 209-219.
- 608 Rasheed, S.A., Harder, L.D., 1997b. Foraging currencies for non-energetic resources: pollen  
609 collection by bumblebees. *Animal Behaviour* 54, 911-926.
- 610 Robinson, G.E., Vargo, E.L., 1997. Juvenile hormone in adult eusocial hymenoptera:  
611 Gonadotropin and behavioral pacemaker. *Archives of Insect Biochemistry and Physiology* 35,  
612 559-583.
- 613 Rodriguez-Pena, N., Stoner, K.E., Ayala-Berdon, J., Flores-Ortiz, C.M., Duran, A., Schondube, J.E.,  
614 2013. Nitrogen and amino acids in nectar modify food selection of nectarivorous bats. *Journal of*  
615 *Animal Ecology* 82, 1106-1115.
- 616 Roubik, D., W., Yanega, D., Aluja, Buchmann, S., L., Inouye, D., W., 1995a. On optimal nectar  
617 foraging by some tropical bees (Hymenoptera: Apidae). *Apidologie* 26, 197-211.
- 618 Roubik, D.W., Yanega, D., Aluja, M., Buchmann, S.L., Inouye, D.W., 1995b. On Optimal Nectar  
619 Foraging by Some Tropical Bees (Hymenoptera, Apidae). *Apidologie* 26, 197-211.

- 620 Saa-Otero, M.P., Diaz-Losada, E., Fernandez-Gomez, E., 2000. Analysis of fatty acids, proteins  
621 and ethereal extract in honeybee pollen - Considerations of their floral origin. *Grana* 39, 175-  
622 181.
- 623 Sanchez, M.G.D., 2011. Taste Perception in Honey Bees. *Chemical Senses* 36, 675-692.
- 624 Schmidt, J.O., 1982. Pollen Foraging Preferences of Honey Bees (Hymenoptera, Apidae).  
625 *Southwestern Entomologist* 7, 255-259.
- 626 Seeley, 2009. The Wisdom of the Hive: the social physiology of honey bee colonies.
- 627 Shafir, S., Menda, G., Smith, B.H., 2005. Caste-specific differences in risk sensitivity in  
628 honeybees, *Apis mellifera*. *Animal Behaviour* 69, 859-868.
- 629 Shafir, S., Reich, T., Tsur, E., Erev, I., Lotem, A., 2008. Perceptual accuracy and conflicting effects  
630 of certainty on risk-taking behaviour. *Nature* 453, 917-920.
- 631 Simmonds, M.S.J., Simpson, S.J., Blaney, W.M., 1992. Dietary Selection Behavior in Spodoptera-  
632 Littoralis - the Effects of Conditioning Diet and Conditioning Period on Neural Responsiveness  
633 and Selection Behavior. *Journal of Experimental Biology* 162, 73-90.
- 634 Simpson, S.J., James, S., Simmonds, M.S.J., Blaney, W.M., 1991. Variation in Chemosensitivity  
635 and the Control of Dietary Selection Behavior in the Locust. *Appetite* 17, 141-154.
- 636 Singaravelan, N., Nee'man, G., Inbar, M., Izhaki, I., 2005. Feeding responses of free-flying  
637 honeybees to secondary compounds mimicking floral nectars. *Journal of Chemical Ecology* 31,  
638 2791-2804.
- 639 Toshima, N., Tanimura, T., 2012. Taste preference for amino acids is dependent on internal  
640 nutritional state in *Drosophila melanogaster*. *The Journal of Experimental Biology* 215, 2827-  
641 2832.
- 642 Wada, A., Isobe, Y., Yamaguchi, S., Yamaoka, R., Ozaki, M., 2001. Taste-enhancing effects of  
643 glycine on the sweetness of glucose: a gustatory aspect of symbiosis between the ant,  
644 *Camponotus japonicus*, and the larvae of the lycaenid butterfly, *Niphanda fusca*. *Chemical*  
645 *Senses* 26, 983-992.
- 646 Waddington, K.D., 2001. Subjective evaluation and choice behavior by nectar- and pollen-  
647 collecting bees, in: Chittka, L., Thompson, J.D. (Eds.), *Cognitive ecology of pollination: animal*  
648 *behavior and floral evolution*. Cambridge University Press, Cambridge, pp. 41-60.
- 649 Waddington, K.D., Gottlieb, N., 1990. Actual vs perceived profitability: a study of floral choice of  
650 honey bees. *Journal of Insect Behavior* 3, 429-441.
- 651 Waddington, K.D., Nelson, C.M., Page, R.E., 1998. Effects of pollen quality and genotype on the  
652 dance of foraging honey bees. *Animal Behaviour* 56, 35-39.
- 653 Weiner, C.N., Hilpert, A., Werner, M., Linsenmair, K.E., Bluthgen, N., 2010. Pollen amino acids  
654 and flower specialisation in solitary bees. *Apidologie* 41, 476-487.
- 655 Wright, G.A., Baker, D.D., Palmer, M.J., Stabler, D., Mustard, J.A., Power, E.F., Borland, A.M.,  
656 Stevenson, P.C., 2013. Caffeine in Floral Nectar Enhances a Pollinator's Memory of Reward.  
657 *Science* 339, 1202-1204.

658

659 **TABLES**

660

661 Table 1: H1 homing test results. Treatments were 40% sucrose control, and 40% sucrose  
662 enriched with 0.1% AA (glycine, leucine, phenylalanine, or proline). The imbibition test  
663 concerned 1050 bees, 70 jars, with 36 hours before testing (see Suppl. 3).

| Endpoints H1:   | Uptake ( $\mu\text{l bee}^{-1} \text{jar}^{-1}$ ) | Mortality (mean % $\text{jar}^{-1}$ ) | Return rate (% bees)           | Flight time (minutes)             |
|-----------------|---------------------------------------------------|---------------------------------------|--------------------------------|-----------------------------------|
| AA treatment    | $F_{4,62}=1.98, P=0.11$                           | $F_{4,62}=1.37, P=0.26$               | $\chi^2=1.35, Df=3, P=0.85$    | $\chi^2=5.38, Df=4, P=0.25$       |
| P & N foragers  | $F_{1,62}=89.1, P<0.001^*$                        | $F_{1,62}=12.6, P<0.001^*$            | $\chi^2=1.61, Df=1, P=0.20$    | $\chi^2=4.56, Df=1, P=0.033$ (ns) |
| Colony A & B    | $F_{1,62}=10.4, P=0.002^*$                        | $F_{1,62}=22.8, P<0.001^*$            | $\chi^2=39.4, Df=1, P<0.001^*$ | $\chi^2=0.18, Df=1, P=0.66$       |
| Trial Sep & Oct | $F_{1,62}=45.1, P<0.001^*$                        | $F_{1,62}=27.5, P<0.001^*$            | $\chi^2=58.9, Df=1, P<0.001^*$ | $\chi^2=23.2, Df=1, P<0.001^*$    |
| Overall mean    | 123 $\mu\text{l}$                                 | 157/1050 bees                         | 330/807 bees                   | median 32 min                     |

664 \* Significant differences between levels had following effect sizes: Solution uptake per forager type (P: 141  $\mu\text{l}$  > N: 107  
665  $\mu\text{l}$ ), per colony (A: 119  $\mu\text{l}$  < B: 130  $\mu\text{l}$ ), and trial (Sept: 112  $\mu\text{l}$  < Oct: 136  $\mu\text{l}$ ). Mortality per forager type (P: 22% > N:  
666 10%), per colony (A: 8% < B: 24%), and trial (Sept: 8% > Oct: 25%). Return rates differed per colony (A: 217 non-  
667 homers vs 224 homers; B: 206 non-homers vs 106 homers), and trial (Sept: 369 non-homers vs 169 homers; Oct: 109  
668 non-homers vs 161 homers). Median flight time differed per trial (Sept: 18 min < Oct: 40 min), but not for forager  
669 type (P: 25 min < N: 35 min; Bonferroni corrected). No interaction between AA treatment and another factor was  
670 indicated.

671 Table 2: H2 homing test results. Treatments were three sucrose solution concentrations:  
672 8, 16, and 32%. Beside pollen and nectar foragers, effects by two colonies were  
673 considered, as tested on individual trial dates. The imbibition test concerned 549 bees,  
674 28 jars, with 16 hours before testing (see Suppl. 3).

| Endpoints H2   | Uptake ( $\mu\text{l bee}^{-1} \text{jar}^{-1}$ ) | Mortality (mean % $\text{jar}^{-1}$ ) | Return rate (% bees)           | Flight time (minutes)             |
|----------------|---------------------------------------------------|---------------------------------------|--------------------------------|-----------------------------------|
| Carbohydrate   | $F_{2,23}=5.59, P=0.011^*$                        | $F_{2,23}=64.0, P<0.001^*$            | $\chi^2=2.88, Df=2, P=0.24$    | $\chi^2=39.7, Df=2, P<0.001^*$    |
| P & N foragers | $F_{1,23}=0.13, P=0.72$                           | $F_{1,23}=0.01, P=0.93$               | $\chi^2=0.17, Df=1, P=0.68$    | $\chi^2=4.38, Df=1, P=0.036$ (ns) |
| Colony B & C   | $F_{1,23}=2.12, P=0.16$                           | $F_{1,23}=2.70, P=0.11$               | $\chi^2=7.00, Df=1, P=0.008^*$ | $\chi^2=18.8, Df=1, P<0.001^*$    |
| Overall mean   | 50.1 $\mu\text{l}$                                | 93/548 bees                           | 384/460 bees                   | median 27 min                     |

675 \* Significant differences between imbibed solutions by bees (42  $\mu\text{l}$  [8] < 58  $\mu\text{l}$  [16 and 32]), mortality rates (24.7% [8] >  
676 8.8% [16] > 1.6% [32]), and also in flight time (36.5 min [8] and 35 min [16] > 14.5 min [32]). Further a colony effect  
677 was indicated for return rates (B: 50 non-homers vs 189 homers; C: 26 non-homers vs 195 homers), and median flight  
678 times per colony (B: 33 min; C: 19min). No interaction between AA treatment and another factor was indicated.

679 Table 3: H3 homing test results. Treatments were 20% sucrose control, and 20% sucrose  
680 enriched with 0.1% AA (glycine, phenylalanine, or proline). The imbibition test  
681 concerned 480 bees, 24 jars, with 20 hours before testing. See Suppl. 3.

| Endpoints H3   | Uptake ( $\mu\text{l bee}^{-1} \text{jar}^{-1}$ ) | Mortality (mean % $\text{jar}^{-1}$ ) | Return rate (% bees)        | Flight time (minutes)       |
|----------------|---------------------------------------------------|---------------------------------------|-----------------------------|-----------------------------|
| AA treatment   | $F_{3,26}=1.27, P=0.31$                           | $F_{3,26}=0.33, P=0.80$               | $\chi^2=1.18, Df=3, P=0.76$ | $\chi^2=3.15, Df=3, P=0.37$ |
| P & N foragers | $F_{1,26}=0.85, P=0.36$                           | $F_{1,26}=1.14, P=0.29$               | $\chi^2=0.77, Df=1, P=0.37$ | $\chi^2=0.13, Df=1, P=0.72$ |
| Colony D & E   | $F_{1,26}=10.7, P=0.003^*$                        | $F_{1,26}=9.81, P=0.004^*$            | $\chi^2=1.18, Df=1, P=0.28$ | $\chi^2=2.86, Df=1, P=0.09$ |
| Overall mean   | 92.5 $\mu\text{l}$                                | 152/480 bees                          | 200/272 bees                | median 30 min               |



682 \* Significant differences between imbibed solutions by bees per colony (D: 87.0  $\mu$ l; E: 98.1  $\mu$ l), and in mortality rates  
683 per colony (D: 23.1%; E: 38.5%). No interaction between AA treatment and another factor was indicated.

## 684 FIGURES

685

686

687

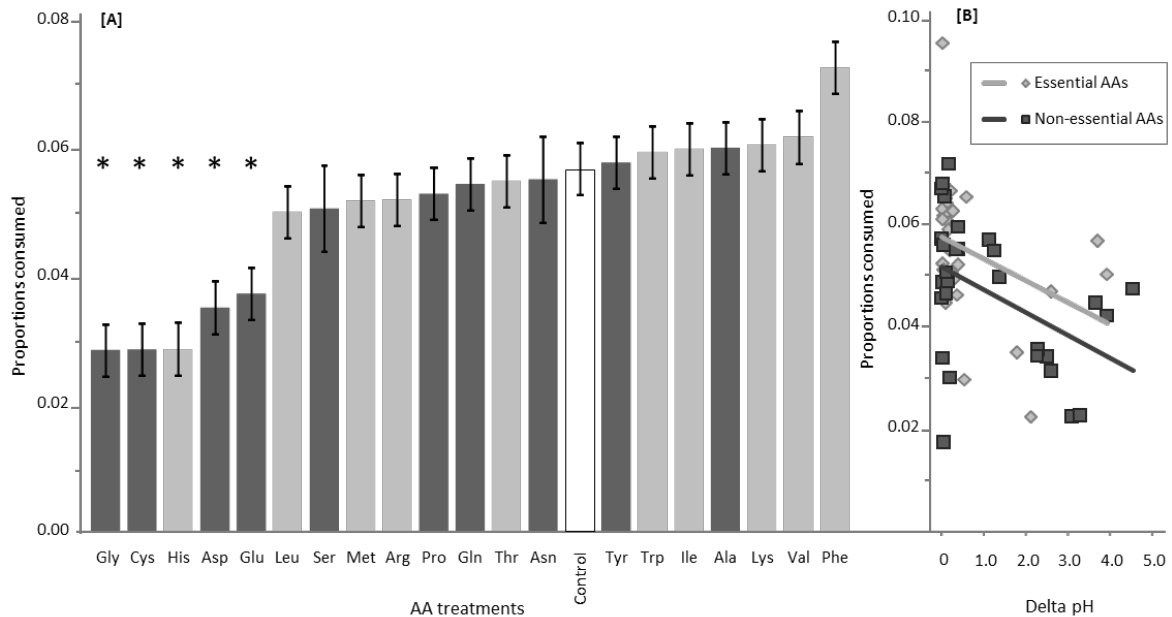

688

689 **Fig. 1.** Amino acid preferences amongst free-flying foragers in an artificial meadow, according to collected  
690 proportions of AA solutions, tested simultaneously against a control. In pane A, as from the left, AAs are  
691 placed from least to most favored. The bars show mean values of collected solution amount per fence  
692 section (mean  $\pm$  SE, n sections; see Supplement 1). The data represent both non-essential (dark grey) and  
693 essential (light grey) AAs. Asterisks (\*) indicate AAs that were significantly different as compared to the  
694 control (white bar). Pane B shows the result of a regression between deviation in pH values (as compared  
695 to the control), and the factor essentiality. Shown are trend lines through pH deviation and mean  
696 proportional consumption data (for each AA, per trial): both pH deviation and essentiality were  
697 explanatory significant. The abbreviations for amino acids are listed in Supplement 2.

698

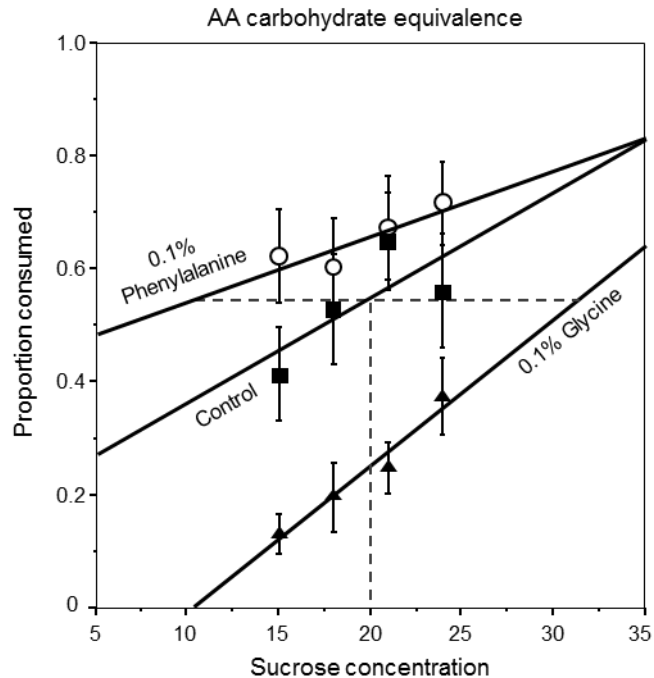

699

700 **Fig. 2.** Tradeoff between AAs and carbohydrates. Bees collected sucrose solutions over a  
701 gradient of 15%, 18%, 21% and 24% sucrose, with and without AA's. The points with error bars  
702 indicate consumed treatment solutions (mean  $\pm$  SE), squares for the control, open circles for  
703 phenylalanine, and triangles for glycine. The control regression line [ $y = 0.019x + 0.175$ ] at  
704 concentration 20% indicates a consumed proportion of 0.549. The horizontal dotted line  
705 indicates the extrapolated equivalence at which 0.1% AA solutions are expected to be consumed  
706 equally to the control. At this level, the 0.1% phenylalanine regression line [ $y = 0.012x + 0.425$ ] is  
707 at 10.6% sucrose concentration, hence at  $+\Delta 9.4\%$  sucrose equivalence. At the same level, the  
708 0.1% glycine regression line [ $y = 0.026x - 0.273$ ] is at 31.4% sucrose, hence at  $-\Delta 11.4\%$  sucrose  
709 equivalence.

710

710

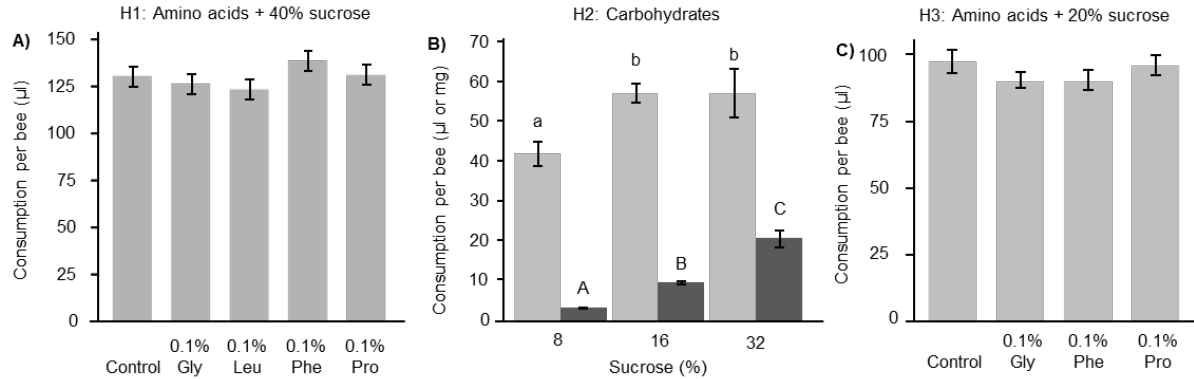

711

712 **Fig. 3.** Dietary uptake (mean  $\pm$  SE) of sucrose solution preceding three homing experiments, to  
713 determine whether AA and carbohydrate nutrition influence flight performance of foragers. In  
714 the first experiment (pane A: H1), forager bees were kept in jars for 36 h, whereas in the  
715 following experiments (pane B and C: H2 and H3) bees were kept in jars for 16 h and 20 h,  
716 respectively. Effect of AAs in 40% (H1) and 20% (H3) sucrose solution consumption are shown  
717 ( $\mu\text{l bee}^{-1} \text{ jar}^{-1}$ ). The effect of a concentration gradient of 8%, 16%, and 32% sucrose (H2) on  
718 consumption is measured in  $\mu\text{l}$  solution (light bars), and given additionally as absolute amount  
719 of sucrose in mg (dark bars). Different letters represent significantly different values ( $P < 0.05$ ;  
720 Tukey). Notable is the indifference in imbibition of phenylalanine and glycine solutions.

721

721

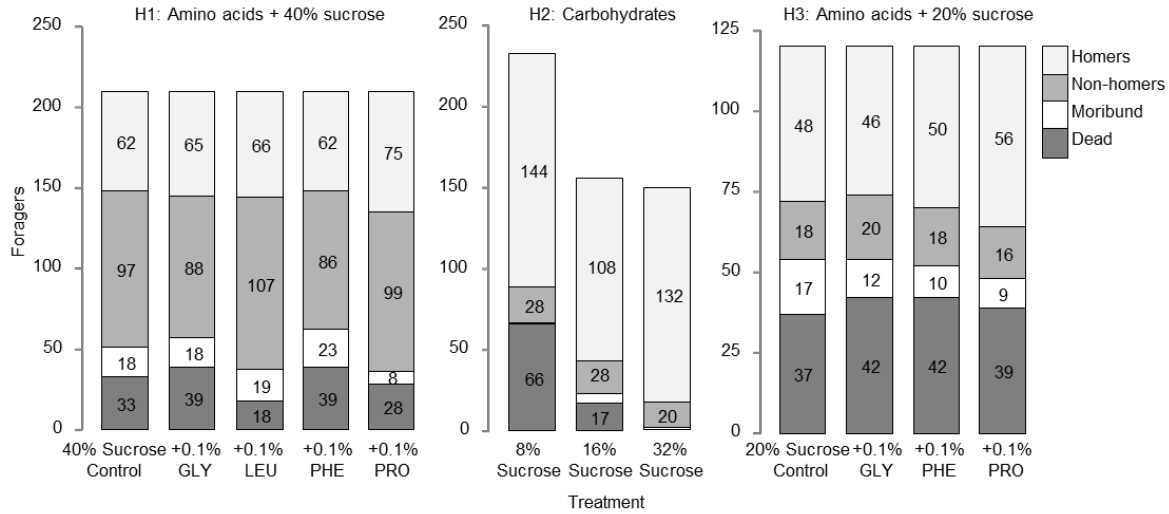

722

723 **Fig 4.** Fates of all the 2079 bees in homing experiments. Those that died during the feeding  
 724 phase were classified as dead. Moribund are those that were alive at release but did not take  
 725 off. Non-homers took off but did not return to the hive. Homers are those that returned to the  
 726 hive. In H2 where a sucrose gradient was tested, we began with more bees in the 8% sucrose  
 727 treatment, anticipating higher mortality.

728

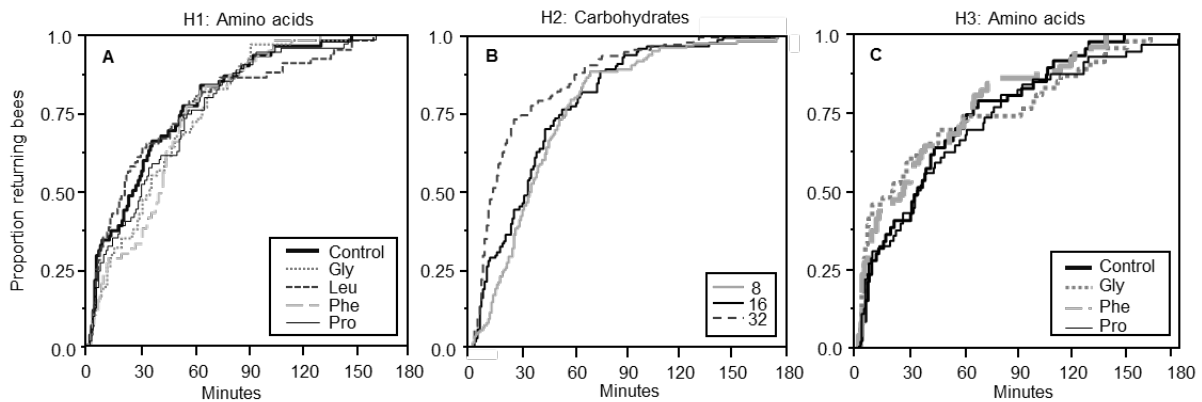

729

730 **Fig 5.** Flight time analyses of cumulative forager homecoming rates. A) Experiment H1, testing  
 731 the effect of 0.1% AA nutrition in presence of 40% sucrose. B) Experiment H2, testing the effect  
 732 of carbohydrate nutrition (a gradient of 8, 16 and 32% sucrose solution). C) Experiment H3,  
 733 testing the effect of 0.1% AA nutrition in presence of 20% sucrose.

734

735 **Supplement 1**

736

737 **S1: EXPERIMENTAL DESIGNS OF FENCE TESTS: AA PREFERENCE AND EQUIVALENCE**

738 The experimental designs of the preference tests of AA on free flying foragers.

739 Treatment solutions were offered to the bees at fence sites close to apiaries. The design

740 follows a Latin square considering that a treatment position in a replicate section is

741 represented only once, so that potential spatial effects are equally balanced within the

742 experimental setups. Three geographically different fence sites were used, on two of

743 our apiaries. Each apiary contained 20-30 hives which were exchanged from time to

744 time. The tests were performed over several months.

745

746 **S1-a Test on essential AAs.** March 08, 2013, apiary 1, fence site 1

747 10 essential AA + 1 control: 8 replicate linear sections

|     |   |           |   |   |   |   |   |   |   |   |   |   |   |
|-----|---|-----------|---|---|---|---|---|---|---|---|---|---|---|
| Ile | A | SECTION 1 | B | K | H | G | I | J | E | F | C | D | A |
| Trp | B | SECTION 2 | D | B | I | C | F | G | H | K | J | A | E |
| Met | C | SECTION 3 | F | E | B | J | C | K | D | G | A | H | I |
| Arg | D | SECTION 4 | H | C | F | B | K | D | G | A | I | E | J |
| His | E | SECTION 5 | J | K | D | H | B | E | A | I | C | G | F |
| Lys | F | SECTION 6 | E | G | I | J | A | C | B | F | H | D | K |
| Phe | G | SECTION 7 | I | F | E | A | G | H | J | B | D | K | C |
| Val | H | SECTION 8 | G | A | J | K | D | I | C | E | F | B | H |
| Thr | I |           |   |   |   |   |   |   |   |   |   |   |   |
| Leu | J |           |   |   |   |   |   |   |   |   |   |   |   |
| Con | K |           |   |   |   |   |   |   |   |   |   |   |   |

748

749 **S1-b Test on nonessential AAs.** March 10, 2013, apiary 1, fence site 1

750 8 non-essential AA + 1 control: 8 replicate linear sections

|     |   |           |   |   |   |   |   |   |   |   |   |   |   |
|-----|---|-----------|---|---|---|---|---|---|---|---|---|---|---|
| Ala | A | SECTION 1 | B |   | H | G | I |   | E | F | C | D | A |
| Asp | B | SECTION 2 | D | B | I | C | F | G | H |   |   | A | E |
| Cys | C | SECTION 3 | F | E | B |   | C |   | D | G | A | H | I |
| Glu | D | SECTION 4 | H | C | F | B |   | D | G | A | I | E |   |
| Gln | E | SECTION 5 |   |   | D | H | B | E | A | I | C | G | F |
| Gly | F | SECTION 6 | E | G | I |   | A | C | B | F | H | D |   |
| Pro | G | SECTION 7 | I | F | E | A | G | H |   | B | D |   | C |
| Tyr | H | SECTION 8 | G | A |   |   | D | I | C | E | F | B | H |
| CON | I |           |   |   |   |   |   |   |   |   |   |   |   |

751

752 **S1-c Test on all AAs (Fig 1): 20 AA + 1 control** 25 replicate block sections:

753 10 sections (black) March 13, 2013, apiary 1, fence sites 1

754 6 sections (red) March 15, 2013, apiary 1, fence sites 1

755 9 sections (green) October 16, 2013, apiary 2, fence sites 2

756

|         |    |    |    |    |    |    |    |    |    |    |    |    |    |    |    |    |    |    |    |    |    |    |    |    |    |    |    |
|---------|----|----|----|----|----|----|----|----|----|----|----|----|----|----|----|----|----|----|----|----|----|----|----|----|----|----|----|
| Glu     | 1  |    | 16 | 5  | 10 |    | 4  |    | 6  | 11 | 15 | 2  | 1  | 17 |    | 9  | 18 | 14 | 7  | 12 | 3  | 8  | 13 | 2  |    | 19 |    |
| Leu     | 2  | 6  | 11 |    | 15 | 4  | 9  | 1  | 17 |    |    | 3  | 18 | 12 | 7  | 14 | 13 | 19 | 2  |    | 8  | 10 | 5  | 16 |    |    |    |
| Arg     | 3  | 17 |    | 1  |    | 9  | 14 | 18 | 12 | 7  | 3  | 8  | 13 |    | 2  | 19 | 5  |    | 16 |    | 10 | 15 |    | 11 | 6  | 4  |    |
| Ala     | 4  | 12 | 7  | 18 | 3  | 14 | 19 | 13 |    | 2  | 8  | 10 | 5  |    | 16 |    |    | 4  | 11 | 6  | 15 |    | 1  |    | 17 | 9  |    |
| Control | 5  |    | 2  | 13 | 8  | 19 |    | 5  |    | 16 | 10 | 55 |    | 6  | 11 | 4  | 1  | 9  |    | 17 |    | 3  | 18 | 7  | 12 | 14 |    |
| Asp     | 6  | 14 | 12 | 7  | 18 | 3  | 8  | 2  | 19 |    | 13 | 5  | 16 |    |    | 10 | 11 | 15 | 6  | 4  |    | 1  |    | 17 | 9  |    |    |
| Gln     | 7  | 9  | 17 |    | 1  |    | 3  | 7  | 14 | 12 | 18 | 13 | 2  | 19 |    | 8  | 16 | 10 |    |    | 5  |    | 11 | 6  | 4  | 15 |    |
| Met     | 8  | 4  | 6  | 11 |    | 15 |    |    | 9  | 17 | 1  | 18 | 7  | 14 | 12 | 3  | 2  | 8  |    | 19 | 13 | 5  | 16 |    |    | 10 |    |
| Lys     | 9  |    |    | 16 | 5  | 10 | 15 | 11 | 4  | 6  |    | 1  |    | 9  | 17 |    | 7  | 3  | 12 | 14 | 18 | 13 | 2  |    | 19 | 8  |    |
| Ile     | 10 | 19 |    | 2  | 13 | 8  | 10 | 16 |    | 5  |    |    | 11 | 4  | 6  | 15 |    |    | 17 | 9  | 1  | 18 | 7  | 12 | 14 | 3  | 18 |
| Trp     | 11 | 10 |    |    | 16 | 5  |    | 6  | 15 | 4  | 11 |    | 17 |    | 9  | 1  | 12 | 18 | 14 | 3  | 7  | 2  |    | 19 | 8  | 13 |    |
| Pro     | 12 | 15 | 4  | 6  | 11 |    | 1  | 17 |    | 9  |    | 7  | 12 | 3  | 14 | 18 |    | 13 | 19 | 8  | 2  | 16 |    |    | 10 | 5  |    |
| Cys     | 13 |    | 9  | 17 |    | 1  | 18 | 12 | 3  | 14 | 7  | 2  |    | 8  | 19 | 13 |    | 5  |    | 10 | 16 | 11 | 6  | 4  | 15 |    |    |
| His     | 14 | 1  |    | 9  | 17 |    | 7  | 14 | 18 | 3  | 12 |    | 19 | 13 | 8  | 2  | 21 | 16 | 10 | 5  |    | 6  | 4  | 15 |    | 11 |    |
| Tyr     | 15 | 18 | 3  | 14 | 12 | 7  | 2  | 19 | 13 | 8  |    |    | 21 | 5  | 10 | 16 | 4  | 11 | 15 |    | 6  | 17 | 9  | 20 | 1  |    |    |
| Gly     | 16 | 13 | 8  | 19 |    | 2  | 16 | 21 | 5  | 10 |    | 6  | 4  |    | 15 | 11 | 9  |    | 20 | 1  | 17 | 12 | 14 | 3  | 18 | 7  |    |
| Val     | 17 | 5  | 10 |    |    | 16 | 11 | 4  |    | 15 | 6  | 17 | 9  | 1  | 20 |    | 14 | 7  | 3  | 18 | 12 |    | 19 | 8  | 13 | 2  |    |
| Thr     | 18 |    | 15 | 4  | 6  | 11 |    | 9  | 1  | 20 | 17 | 12 | 14 | 18 | 3  | 7  | 19 | 2  | 8  | 13 |    |    | 21 | 10 | 5  | 16 |    |
| Phe     | 19 | 16 | 5  | 10 | 21 |    | 6  | 15 | 11 |    | 4  | 9  | 20 |    | 1  | 17 | 3  | 12 | 18 | 7  | 14 | 19 | 8  | 13 | 2  |    |    |
| Asn     | 20 | 2  | 13 | 8  | 19 |    |    | 10 | 16 | 5  | 21 | 4  | 15 | 11 |    | 6  | 20 | 17 | 1  |    | 9  | 14 | 3  | 18 | 7  | 12 |    |
| Ser     | 21 | 7  | 18 | 3  | 14 | 12 |    | 8  | 2  | 13 | 19 | 21 | 10 | 16 | 5  |    | 15 | 6  |    | 11 | 4  | 9  | 20 | 1  |    | 17 |    |
|         |    |    | 1  | 20 | 9  | 17 | 12 | 3  | 7  | 18 | 14 | 19 | 8  | 2  | 13 |    | 10 |    | 5  | 16 | 21 | 4  | 15 |    | 11 | 6  |    |
|         |    | 11 |    | 15 | 4  | 6  | 17 | 20 |    | 1  | 9  | 14 | 3  | 7  | 18 | 12 | 8  |    | 13 | 2  | 19 | 21 | 10 | 5  | 16 |    |    |

757

758

758

759 **S1-d Test on AA equivalence (Fig. 2):** Tradeoff between carbohydrates and AAs

760 12 replicate block sections, apiary 1, fence site 3

761 2 sections (black) November 5, 2013

762 4 sections (red) November 7, 2013

763 6 sections (green) November 20, 2013

764

|    |                        |    |    |    |    |    |    |    |    |    |    |    |    |
|----|------------------------|----|----|----|----|----|----|----|----|----|----|----|----|
| 1  | 15% Sucrose            | 4  | 11 | 8  | 9  | 3  | 6  | 1  | 5  | 7  | 10 | 2  | 12 |
| 2  | 18% Sucrose            | 5  | 1  | 9  | 4  | 10 | 8  | 3  | 12 | 2  | 7  | 6  | 11 |
| 3  | 21% Sucrose            | 7  | 10 | 3  | 1  | 12 | 2  | 8  | 11 | 6  | 5  | 9  | 4  |
| 4  | 24% Sucrose            | 2  | 6  | 12 | 5  | 11 | 7  | 10 | 9  | 4  | 1  | 8  | 3  |
| 5  | 15% Sucrose + 0.1% GLY | 9  | 5  | 11 | 8  | 1  | 10 | 7  | 6  | 12 | 3  | 4  | 2  |
| 6  | 18% Sucrose + 0.1% GLY | 1  | 7  | 6  | 3  | 5  | 11 | 2  | 4  | 9  | 8  | 12 | 10 |
| 7  | 21% Sucrose + 0.1% GLY | 3  | 4  | 2  | 6  | 9  | 12 | 5  | 10 | 8  | 11 | 1  | 7  |
| 8  | 24% Sucrose + 0.1% GLY | 8  | 12 | 10 | 2  | 7  | 4  | 11 | 1  | 3  | 6  | 5  | 9  |
| 9  | 15% Sucrose + 0.1% PHE | 11 | 8  | 1  | 10 | 2  | 9  | 4  | 7  | 5  | 12 | 3  | 6  |
| 10 | 18% Sucrose + 0.1% PHE | 10 | 3  | 4  | 12 | 8  | 1  | 6  | 2  | 11 | 9  | 7  | 5  |
| 11 | 21% Sucrose + 0.1% PHE | 12 | 2  | 7  | 11 | 6  | 5  | 9  | 3  | 1  | 4  | 10 | 8  |
| 12 | 24% Sucrose + 0.1% PHE | 6  | 9  | 5  | 7  | 4  | 3  | 12 | 8  | 10 | 2  | 11 | 1  |

765

766

767 **Supplement 2**

768

769 **S2: TABLE AMINO ACID INFORMATION (Fig. 1; Supplement S1-c)**

770 Background information on amino acids for tests on preferences by nectar foragers

771

| Amino acids   | L/D Isomere |                  | Molecular weight | mM (0.1% w/w) | Proportion | SD   | (n)  | pH (n)   | Delta pH |
|---------------|-------------|------------------|------------------|---------------|------------|------|------|----------|----------|
| Arginine      | Arg         | L-ARGININE base  | 174.2            | 6.17          | 5.19%      | 2.0% | (25) | 9.46 (3) | 3.53     |
| Histidine     | His         | L-HISTIDINE base | 155.16           | 6.93          | 2.86%      | 2.3% | (25) | 7.39 (3) | 1.63     |
| Isoleucine    | Ile         | L-ISOLEUCINE     | 131.18           | 8.20          | 5.98%      | 2.0% | (25) | 6.20 (3) | 0.42     |
| Leucine       | Leu         | L-LEUCINE        | 131.18           | 8.20          | 5.00%      | 1.9% | (25) | 5.92 (3) | 0.17     |
| Lysine        | Lys         | L-LYSINE HCL     | 182.65           | 5.89          | 6.04%      | 2.2% | (25) | 5.74 (3) | 0.18     |
| Methionine    | Met         | L-METHIONINE     | 149.21           | 7.21          | 5.18%      | 2.0% | (25) | 5.79 (3) | 0.17     |
| Phenylalanine | Phe         | L-PHENYLALANINE  | 165.19           | 6.51          | 7.26%      | 2.6% | (25) | 5.90 (3) | 0.03     |
| Threonine     | Thr         | L-THREONINE      | 119.12           | 9.03          | 5.49%      | 1.9% | (25) | 5.94 (3) | 0.11     |
| Tryptophan    | Trp         | L-TRYPTOPHAN     | 204.25           | 5.26          | 5.94%      | 2.3% | (25) | 5.83 (3) | 0.12     |
| Valine        | Val         | L-VALINE         | 117.15           | 9.18          | 6.17%      | 2.1% | (25) | 6.01 (3) | 0.10     |
| Alanine       | Ala         | L-ALANINE        | 89.1             | 12.07         | 6.00%      | 1.8% | (25) | 5.99 (3) | 0.09     |
| Asparagine    | Asn         | L-ASPARAGINE     | 132.12           | 8.14          | 5.51%      | 2.8% | (9)  | 5.20 (1) | 0.35     |
| Aspartate     | Asp         | L-ASPARTIC ACID  | 133.1            | 8.08          | 3.50%      | 1.5% | (25) | 2.89 (3) | 2.89     |
| Cysteine      | Cys         | L-CYSTEINE HCL   | 175.63           | 6.12          | 2.85%      | 1.9% | (25) | 2.26 (3) | 3.52     |
| Glutamine     | Gln         | L-GLUTAMINE      | 146.15           | 7.36          | 5.44%      | 1.6% | (25) | 4.65 (3) | 1.23     |
| Glutamate     | Glu         | L-GLUTAMIC ACID  | 147.13           | 7.31          | 3.72%      | 1.8% | (25) | 3.16 (3) | 2.62     |
| Glycine       | Gly         | GLYCINE          | 75.07            | 14.32         | 2.84%      | 1.9% | (25) | 6.00 (3) | 0.11     |
| Proline       | Pro         | L-PROLINE        | 115.13           | 9.34          | 5.28%      | 1.8% | (25) | 5.80 (3) | 0.12     |
| Serine        | Ser         | L-SERINE         | 105.09           | 10.23         | 5.06%      | 2.8% | (9)  | 5.44 (1) | 0.11     |
| Tyrosine      | Tyr         | L-TYROSINE       | 181.19           | 5.93          | 5.77%      | 2.1% | (25) | 6.06 (3) | 0.24     |
| Control       | Con         |                  |                  |               | 5.68%      | 2.2% | (25) | 5.91 (3) | 0.00     |

[1]

[2]

[3]

[4]

[5]

772

773

774

775

776

777

778

779

780

781

782

783

784

[1] The amino acids were ordered from Sigma-Aldrich (Israel) and PureBulk (USA).

Certificates of analysis (COA) per AA indicated purity of a mean  $99.7 \pm 0.7\%$  SD.

[2] 0.1% equals 1.0 g AA / 1.0 kg solution (w/w), thus 1.0 g / 0.930 L (w/v), which equals MW / 0.930 moles per L.

This conversion of 0.1% AA (w/w) to molarity is based on the volume of 1.0 Kg of a 20% sucrose solution: 930 ml.

Equally: our tested concentration was at 108 mg / 100 ml, allowing comparisons, e.g. to Inouye and Waller (1984).

[3] The preferences for 20 AAs as indicating by free flying bees visiting replicate fence sections which all contained

each AA once. A unique spatial pattern for each section was considered (Supplement S1-c). Proportions collected

solutions were calculated per replicate fence section.

[4] The reported standard deviation of pH measurements was between separate batches of measurements.

Measurements were conducted with a Microprocessor pH Meter, "pH 211", Hanna Instruments. A mean pH is given

of n trials, at which all pH values were an average of a threefold measurement.

[5] pH deviation data were derived of all AAs in experiment S1-c, in comparison to controls of the same date.



785

786 **Supplement 3**

787

788 **S3: TABLE HOMING EXPERIMENTS**

789 Experimental designs of three homing experiments, as described in the materials and  
 790 methods section. The tests aimed to monitor AA nutrition effects on forager flight (H1  
 791 and H3) considering AA-induced alterations in carbohydrate uptake. Separately,  
 792 carbohydrate uptake effects were tested in the second experiment (H2).

| <b>H1: AAs in 40% Sucrose</b> | <b>DATE</b>        | <b>HIVE</b> | <b>Pol/Nec</b> | <b>COLOR</b> | <b>JARS</b> | <b>BEEES</b> |
|-------------------------------|--------------------|-------------|----------------|--------------|-------------|--------------|
| Control                       | September 24, 2013 | B           | N              | WHITE        | 4           | 60           |
| Control                       | October 2, 2013    | A           | N              | BLUE         | 3           | 45           |
| Control                       | September 24, 2013 | A           | P              | WHITE        | 4           | 60           |
| Control                       | October 2, 2013    | B           | P              | BLUE         | 3           | 45           |
| 0.1% Gly                      | September 24, 2013 | B           | N              | YELLOW       | 4           | 60           |
| 0.1% Gly                      | October 2, 2013    | A           | N              | GREEN        | 3           | 45           |
| 0.1% Gly                      | September 24, 2013 | A           | P              | YELLOW       | 4           | 60           |
| 0.1% Gly                      | October 2, 2013    | B           | P              | GREEN        | 3           | 45           |
| 0.1% Leu                      | September 24, 2013 | B           | N              | BLUE         | 4           | 60           |
| 0.1% Leu                      | October 2, 2013    | A           | N              | RED          | 3           | 45           |
| 0.1% Leu                      | September 24, 2013 | A           | P              | BLUE         | 4           | 60           |
| 0.1% Leu                      | October 2, 2013    | B           | P              | RED          | 3           | 45           |
| 0.1% Phe                      | September 24, 2013 | B           | N              | RED          | 4           | 60           |
| 0.1% Phe                      | October 2, 2013    | A           | N              | YELLOW       | 3           | 45           |
| 0.1% Phe                      | September 24, 2013 | A           | P              | RED          | 4           | 60           |
| 0.1% Phe                      | October 2, 2013    | B           | P              | YELLOW       | 3           | 45           |
| 0.1% Pro                      | September 24, 2013 | B           | N              | GREEN        | 4           | 60           |
| 0.1% Pro                      | October 2, 2013    | A           | N              | WHITE        | 3           | 45           |
| 0.1% Pro                      | September 24, 2013 | A           | P              | GREEN        | 4           | 60           |
| 0.1% Pro                      | October 2, 2013    | B           | P              | WHITE        | 3           | 45           |
| <b>5 treatments</b>           | <b>2</b>           | <b>2</b>    | <b>2</b>       | <b>5</b>     | <b>70</b>   | <b>1050</b>  |
| <b>H2: Carbohydrates</b>      | <b>DATE</b>        | <b>HIVE</b> | <b>Pol/Nec</b> | <b>COLOR</b> | <b>JARS</b> | <b>BEEES</b> |
| 8% sucrose                    | November 5, 2013   | B           | N              | BLUE         | 3           | 60           |
| 8% sucrose                    | November 12, 2013  | C           | N              | BLUE         | 3           | 60           |
| 8% sucrose                    | November 5, 2013   | B           | P              | YELLOW       | 3           | 54           |
| 8% sucrose                    | November 12, 2013  | C           | P              | YELLOW       | 3           | 63           |
| 16% sucrose                   | November 5, 2013   | B           | N              | WHITE        | 2           | 40           |
| 16% sucrose                   | November 12, 2013  | C           | N              | WHITE        | 2           | 40           |
| 16% sucrose                   | November 5, 2013   | B           | P              | GREEN        | 2           | 36           |
| 16% sucrose                   | November 12, 2013  | C           | P              | GREEN        | 2           | 40           |
| 32% sucrose                   | November 5, 2013   | B           | N              | AZURE        | 2           | 40           |
| 32% sucrose                   | November 12, 2013  | C           | N              | AZURE        | 2           | 40           |
| 32% sucrose                   | November 5, 2013   | B           | P              | RED          | 2           | 36           |
| 32% sucrose                   | November 12, 2013  | C           | P              | RED          | 2           | 40           |
| <b>3 treatments</b>           | <b>2</b>           | <b>2</b>    | <b>2</b>       | <b>6</b>     | <b>28</b>   | <b>549</b>   |
| <b>H3: AAs in 20% Sucrose</b> | <b>DATE</b>        | <b>HIVE</b> | <b>Pol/Nec</b> | <b>COLOR</b> | <b>JARS</b> | <b>BEEES</b> |
| Control                       | April 10, 2014     | D           | N              | DARK GREEN   | 2           | 30           |
| Control                       | April 10, 2014     | E           | N              | DARK GREEN   | 2           | 30           |
| Control                       | April 10, 2014     | D           | P              | LIGHT GREEN  | 2           | 30           |
| Control                       | April 10, 2014     | E           | P              | LIGHT GREEN  | 2           | 30           |
| 0.1% Gly                      | April 10, 2014     | D           | N              | YELLOW       | 2           | 30           |
| 0.1% Gly                      | April 10, 2014     | E           | N              | YELLOW       | 2           | 30           |
| 0.1% Gly                      | April 10, 2014     | D           | P              | WHITE        | 2           | 30           |
| 0.1% Gly                      | April 10, 2014     | E           | P              | WHITE        | 2           | 30           |
| 0.1% Phe                      | April 10, 2014     | D           | N              | DARK BLUE    | 2           | 30           |
| 0.1% Phe                      | April 10, 2014     | E           | N              | DARK BLUE    | 2           | 30           |
| 0.1% Phe                      | April 10, 2014     | D           | P              | LIGHT BLUE   | 2           | 30           |
| 0.1% Phe                      | April 10, 2014     | E           | P              | LIGHT BLUE   | 2           | 30           |
| 0.1% Pro                      | April 10, 2014     | D           | N              | ORANGE       | 2           | 30           |
| 0.1% Pro                      | April 10, 2014     | E           | N              | ORANGE       | 2           | 30           |
| 0.1% Pro                      | April 10, 2014     | D           | P              | RED          | 2           | 30           |
| 0.1% Pro                      | April 10, 2014     | E           | P              | RED          | 2           | 30           |
| <b>6 treatments</b>           | <b>1</b>           | <b>2</b>    | <b>2</b>       | <b>8</b>     | <b>32</b>   | <b>480</b>   |

793

794

795

796

797

798

[1] Treatments were offered to bees in jars, either with a 36 hr. (H1), a 16 hr. (H2) or 20 hr. (H3) imbibition period.

[2] Homing bees at H1 and H3 were monitored by 4 experimenters (2 hives per date), and H2 with 2 experimenters (1 hive per date).

[3] Five different hives: One story 10-frame hive, with 4-6 frames brood, with an empty hive box on top to contain the jars with bees.

[4] Pollen and nectar collectors, caught as incoming foragers at a closed hive entrance, were contained and tested separately.

[5] Thorax markers: Solvent based "Edding 750 paint marker, Japan" (H1 & H2) / water based "uni POSCA, Japan" (H3).

799 [6] A total 130 jars with 15 bees (H1 and H3) or 20 bees (H2), for consumption data per alive bee, and mortality over time.  
800 [7] A total of 2079 bees entered the setup of the three homing experiments.

801 **Supplement 4**

802

803 **S4: EQUIVALENCE EXPERIMENTS**

804 For the AAs phenylalanine and glycine, an extrapolation assessed the equivalence of  
805 0.1% AA to % sucrose (S1-d). The extrapolated points were beyond the tested gradient,  
806 thus additional experiments were performed to verify the expected equivalence: 20%  
807 sucrose  $\approx$  10.6% sucrose + 0.1 % phenylalanine  $\approx$  31.4% sucrose + 0.1% glycine

808

809 Design A: 3 treatments abc, 9 replicate sections, 54 test tubes, November 25, 2013, Apiary 1, fence site 3

| 1 |   | 2 |   | 3 |   | 4 |   | 5 |   | 6 |   | 7 |   | 8 |   | 9 |   |
|---|---|---|---|---|---|---|---|---|---|---|---|---|---|---|---|---|---|
| a | c | b | b | a | c | b | a | c | c | b | a | a | c | a | c | b | b |
| a | b | c | a | c | b | b | a | a | b | c | c | c | b | a | b | c | a |
| c | b | a | c | b | a | c | c | b | a | a | b | b | a | c | b | a | c |

810

811 a (n=18) 11.6% sucrose<sup>1</sup> + 0.1% phenylalanine pH=8.05<sup>2</sup>

812 b (n=18) 20.0% sucrose<sup>1</sup> pH=8.11<sup>2</sup>

813 c (n=18) 31.7% sucrose<sup>1</sup> + 0.1% glycine<sup>4</sup> pH=8.09<sup>2</sup>

814

815 Design B: 4 treatments ABCD, 25 replicate sections, 100 test tubes, April 29, 2014, Apiary 1, fence site 3

| 1 | 2 | 3 | 4 | 5 | 6 | 7 | 8 | 9 | 10 | 11 | 12 | 13 | 14 | 15 | 16 |
|---|---|---|---|---|---|---|---|---|----|----|----|----|----|----|----|
| A | D | B | C | B | D | C | A | D | A  | C  | B  | D  | B  | C  | A  |
| C | B | D | A | C | A | B | D | B | C  | A  | D  | C  | A  | D  | B  |
| D | A | C | B | A | C | D | B | A | D  | B  | C  | A  | C  | B  | D  |
| B | C | A | D | D | B | A | C | C | B  | D  | A  | B  | D  | A  | C  |

816

817 A (n=16) 20.0% sucrose<sup>1</sup> pH=6.55<sup>3</sup>

818 B (n=16) 20.0% sucrose<sup>1</sup> + 0.1% glycine<sup>5</sup> pH=6.91<sup>3</sup>

819 C (n=16) 30.0% sucrose<sup>1</sup> + 0.1% glycine<sup>5</sup> pH=6.72<sup>3</sup>

820 D (n=16) 40.0% sucrose<sup>1</sup> + 0.1% glycine<sup>5</sup> pH=6.64<sup>3</sup>

821

822 <sup>1</sup> Refractometer / brix values. <sup>2</sup> pH values are the mean of 2 measurements. <sup>3</sup> pH values are the mean of 3  
823 measurements. <sup>4</sup> Glycine "Purebulk", manufacture date January 17 2013, ordered February 2013, tested  
824 November 2013. <sup>5</sup> Glycine "Sigma", manufacture date unknown, ordered April 2014, tested April 2014.

825

|                       | Effect Tests      | Significance | Dunnnett      | Least Square Mean |
|-----------------------|-------------------|--------------|---------------|-------------------|
| Equivalence check A   | $F_{2,51} = 10.1$ | $P < 0.001$  |               | Proportion        |
| 20% control           |                   |              |               | 0.437             |
| 11.6% + phenylalanine |                   |              | $P = 0.29$    | 0.372             |
| 31.7% + glycine       |                   |              | $P < 0.001$ * | 0.231             |
| Equivalence check B   | $F_{3,60} = 25.6$ | $P < 0.001$  |               | Proportion        |
| 20% control           |                   |              |               | 0.205             |
| 20% + glycine         |                   |              | $P = 0.026$ * | 0.115             |
| 30% + glycine         |                   |              | $P = 0.083$   | 0.279             |
| 40% + glycine         |                   |              | $P < 0.001$ * | 0.400             |

826

827 Results A: [a=b] 1 part phenylalanine  $\approx$  84 parts sucrose, and [b>c] 1 part glycine > 117 parts sucrose.

828 Results B: [A<B] 1 part glycine  $\approx$  deterrent, and [B=C] 1 part glycine  $\approx$  100 parts sucrose ( $\Delta$ 10% sucrose).

| Test strengths      | $\alpha$ | $\sigma$ | $\delta$ | Sample Size | Power |
|---------------------|----------|----------|----------|-------------|-------|
| Equivalence check A | 0.05     | 0.141    | 0.086    | 54          | 0.98  |
| Equivalence check B | 0.05     | 0.095    | 0.104    | 64          | 1.00  |

829

830 Conclusion: 1 part phenylalanine  $\approx$  84 parts sucrose. 1 part glycine  $\geq$  100 parts, but  $<$ 200 parts sucrose.
